Yield, nutritional quality, and fatty acid content of organic winter rye (*Secale cereale*) and winter wheat (*Triticum aestivum*) forages under cattle (*Bos taurus*) grazing conditions

Yield, quality, and fatty acids of organic small grain forages for grazing

Hannah N. Phillips<sup>1, 2\*</sup>, Bradley J. Heins<sup>1, 2</sup>, Kathleen Delate<sup>3</sup>, Robert Turnbull<sup>3</sup>

<sup>1</sup>West Central Research and Outreach Center, University of Minnesota, Morris, Minnesota, United States of America

<sup>2</sup>Department of Animal Science, University of Minnesota, St. Paul, Minnesota, United States of America

<sup>3</sup>Departments of Agronomy and Horticulture, Iowa State University, Ames, Iowa, United States of America

\* Corresponding author

Email: phil1149@umn.edu (HP)

# Abstract

The objective of this study was to assess yield, nutritional quality, and fatty acid compositions of winter rye (*Secale cereale*) and winter wheat (*Triticum aestivum*) forages for grazing cattle (*Bos taurus*) in an organic system. The rye and wheat were established on two 4 ha plots in September 2015. Six groups of dairy steers rotationally grazed rye (n = 3) or wheat (n = 3) plots divided into seven paddocks (n = 14) from April to June 2016. Forage samples (n = 96) taken prior to paddock grazing were used to analyze forage characteristics. Mixed models with fixed factors of forage, date, and their interaction, a random subject factor of group nested in paddock, and a repeated effect of date were used for each outcome. The linear effect of date on fatty acids was obtained by substituting date as a continuous variable. The mean forage yield for rye was greater ( $P < 0.05$ ) than wheat (mean  $\pm$  standard error; 2840 and 2571  $\pm$  82 kg ha<sup>-1</sup>, respectively). However, rye yielded less in the latter part of the grazing period. Wheat (19.3  $\pm$  0.30% DM) had greater ( $P < 0.001$ ) crude protein than rye (17.6  $\pm$  0.30% DM). In general, crude protein, digestibility, and minerals decreased during the grazing period. Wheat (66.3  $\pm$  0.54 g 100g<sup>-1</sup>) had greater ( $P < 0.001$ ) alpha-linolenic acid (18:3n-3) concentration than rye (63.3  $\pm$  0.54 g 100g<sup>-1</sup>). Although both forages decreased ( $P < 0.05$ ) in alpha-linolenic acid concentration, wheat decreased 2.49 times more ( $P < 0.001$ ) per d compared to rye forage. Winter rye and winter wheat forages are viable for cattle grazing. Producers

22 should initiate early grazing to maximize protein, digestibility, and alpha-linolenic  
23 acid intake while the forages are immature.

## 24 Introduction

25 The growing demand for organic beef and dairy products [1] is partially  
26 driven by consumer interest in perceived health benefits [2] of the altered fatty  
27 acid (**FA**) profiles of organic beef and milk lipids [3–6]. Products from organic  
28 cattle have a desirable FA profile, including greater concentrations of conjugated  
29 linoleic acid and omega-3 FA (***n*-3**), and lower omega-6:omega-3 FA ratios (***n*-**  
30 **6:*n*-3**), compared to conventionally-fed cattle that consume a greater proportion  
31 of their diet as grain and grain-derived feedstuff [3,4,6]. A greater concentration  
32 of alpha-linolenic acid (**18:3*n*-3**) in forages has a positive influence on the  
33 concentration of *n*-3 in milk and lipids of beef [7]. Furthermore, fresh forages  
34 contain even greater concentrations of 18:3*n*-3 than processed or stored forages  
35 [8,9]. Thus, increasing the intake of fresh forages via pasture grazing can  
36 improve the nutritional quality of milk and beef products while allowing producers  
37 an opportunity to capitalize on forage production for grazing systems.

38 The rules of the United States Department of Agriculture National Organic  
39 Program (§205.237) [10] require that cattle consume at least 30% of their dry  
40 matter intake from pasture, except during the finishing phase for beef, and  
41 require an active soil building plan to limit soil erosion and nutrient leaching.  
42 Pasture grazing is also a low-cost method to feed cattle compared to feeding  
43 stored organic grains and forages [11]. Hence, one of the main obstacles organic

44 beef and dairy producers face is lack of pasture forages for grazing [12]. In the  
 45 upper Midwest of the United States of America (**USA**), perennial grasses and  
 46 legumes, such as alfalfa (*Medicago sativa*), chicory (*Cichorium intybus*), meadow  
 47 brome grass (*Bromus biebersteinii*), meadow fescue (*Festuca pratensis*), orchard  
 48 grass (*Dactylis glomerata*), perennial ryegrass (*Lolium perenne*), red clover  
 49 (*Trifolium pratense*), and white clover (*Trifolium repens*), are common pasture  
 50 forages typically grazed beginning in May. Establishing cold hardy winter cover  
 51 crops in the fall to protect bare soil after crop harvest is a popular method to meet  
 52 the soil building requirement [13]. Furthermore, these winter cover crops yield  
 53 forage in early spring; thus, winter cover crop grazing — prior to perennial  
 54 pasture grazing in the spring — may be advantageous for producers by  
 55 extending the grazing season [14]. Winter rye (*Secale cereale*; **WR**) and winter  
 56 wheat (*Triticum aestivum*; **WW**) are adapted to low temperatures and yield forage  
 57 in the early spring. Although, integrating small grain cover crops into pasture  
 58 systems extends the grazing season, farmers may be reluctant to graze livestock  
 59 on the forages because of inconstant nutritional quality and rapid decreases in  
 60 nutritional quality as forages mature [15].

61 As pasture-based beef and dairy industries grow, it is important to assess  
 62 alternative forages and understand their impacts on production and nutritional  
 63 quality for grazing. Therefore, the objectives of this study were to assess and  
 64 compare WR and WW pastures for forage yield, dry matter (**DM**), nutritional  
 65 quality, mineral composition, and FAs during the grazing season.

## 66 **Materials and methods**

### 67 **Ethical statement**

68           Researchers conducted this study at the University of Minnesota West  
69           Central Research and Outreach Center (**WCROC**) in Morris, Minnesota, USA.  
70           The University of Minnesota Institutional Animal Care and Use Committee  
71           approved all animal care and management (Protocol Number: 1411-32060A).

### 72 **Study background**

73           The WCROC research dairy has 300 low-input conventional and organic  
74           grazing cows. The organic herd was certified with the Midwest Organic Services  
75           Association in June 2010, which is accredited by the United States Department  
76           of Agriculture National Organic Program. The herd was part of a crossbreeding  
77           program established in 2000, as described by Heins et al. [16]. A sociological  
78           component of the current study detailed specific obstacles related to integrating  
79           crops and livestock as identified by producers over the course of the project, and  
80           reported increasing support for integrated crop-livestock systems resulting in  
81           growing communities of practice in which farmer-to-farmer knowledge exchange  
82           and peer support overcome obstacles to success in these systems [17].

### 83 **Pasture establishment**

84           The WR (*S. cereale*) and WW (*T. aestivum*) were established on two  
85           adjacent 4 ha plots in September 2015. The study chose these forages based on  
86           their hardiness and popularity as cover crops in the upper Midwest of the USA.

87 Prior to planting, the WCROC utilized the plots for grazing dairy cattle and  
88 included perennial forages for at least 20 years. Manure from cattle deposited  
89 during grazing fertilized pastures, and the study used no additional fertilizer or  
90 irrigation.

## 91 **Experimental approach**

92 Six groups of five Holstein and crossbred dairy steers (*Bos taurus*; n = 30)  
93 born at the WCROC (March – May 2015) were used in this study. Steers were  
94 grouped by age and breed composition. Details on care are explained by Phillips  
95 et al. [18]. Prior to grazing, steers were housed in a loose-confinement barn in  
96 their respective groups, and were fed an organic total mixed ration diet of corn  
97 silage, alfalfa silage, corn, soybean meal, and minerals from weaning (ca. 10  
98 weeks of age) until grazing (ca. 12 months of age). One steer died from  
99 peritonitis and was removed from the study prior to grazing.

100 Grazing initiated when forage height reached 15 cm in plots on 25 April  
101 2016. The six steer groups were randomly assigned to graze WR (n = 3) or WW  
102 (n = 3), and forages were balanced by age and breed. Steers remained in their  
103 groups throughout the grazing period and were separated by temporary electric  
104 fencing. The groups rotationally grazed 0.57 ha paddocks in WR (n = 7) and WW  
105 (n = 7) plots for seven weeks, supplemented by ad libitum minerals. The stocking  
106 density was approximately 25 ha<sup>-1</sup> (10,650 kg ha<sup>-1</sup>) per paddock. Groups rotated  
107 paddocks every 3 – 4 d depending on forage availability. The plots were grazed  
108 three times with an average (± standard deviation) regrowth period of 17 (± 6) d.

109 Steers had a similar average daily gain (**ADG**) of 0.87 kg d<sup>-1</sup> from birth until  
110 harvest. Similarly, Bjorklund et al. [19] reported ADG of 0.62 – 0.82 kg d<sup>-1</sup> for  
111 organic grass-fed dairy steers of breeds similar to those used in this study.  
112 Steers grazed on WR (0.33 kg d<sup>-1</sup>) and WW (0.32 kg d<sup>-1</sup>) had similar ADG for the  
113 grazing period.

## 114 **Data collection**

### 115 **Weather**

116 The WCROC weather station recorded daily weather. Table 1 reports the  
117 monthly mean temperature, total precipitation, and total snowfall for the 130-year  
118 long-term mean (1886 – 2016) and for the duration of the current study  
119 (September 2015 – June 2016). The temperature during the current study was  
120 similar to the long-term mean. Precipitation during the spring months (May and  
121 June), and total snowfall were about 45% and 35% less than the long-term  
122 mean, respectively.

**Table 1. Monthly weather for the study (2015 – 2016) and long-term mean (1886 – 2016).**

|                                | Sep | Oct      | Nov       | Dec       | Jan       | Feb       | Mar       | Apr      | May     | Jun | Mean       |
|--------------------------------|-----|----------|-----------|-----------|-----------|-----------|-----------|----------|---------|-----|------------|
| Temperature, °C <sup>a</sup>   |     |          |           |           |           |           |           |          |         |     |            |
| Study                          | 14  | 6        | 0         | -6        | -11       | -8        | 0         | 3        | 10      | 16  | 2          |
| LTM                            | 15  | 8        | -1        | -9        | -13       | -10       | -3        | 6        | 14      | 19  | 3          |
|                                |     |          |           |           |           |           |           |          |         |     | Sum        |
| Precipitation, mm <sup>b</sup> |     |          |           |           |           |           |           |          |         |     |            |
| Study                          | 34  | 40       | 47<br>5   | 27<br>287 | 7<br>112  | 17<br>155 | 16<br>36  | 47<br>36 | 51      | 48  | 333<br>630 |
| LTM                            | 59  | 47<br>18 | 25<br>127 | 17<br>178 | 18<br>178 | 18<br>188 | 30<br>198 | 58<br>84 | 76<br>3 | 102 | 447<br>973 |

---

Daily weather collected from the WCROC weather station (Morris, MN, USA).

LTM = 130-year long-term mean

<sup>a</sup>Temperature expressed as monthly means

<sup>b</sup>Preprecipitation expressed as monthly sums; italics indicate snowfall

123

## 124 **Forage yield and dry matter**

125       Three random forage samples were collected from each group within the  
126       paddock prior to grazing by tossing a 0.23 m<sup>2</sup> quadrat and clipping the forage  
127       inside to a height of 5 cm above the soil (25 April – 10 June 2016). The samples  
128       were used to determine DM, herbage mass, forage quality, and FAs.

129       Forage yield was calculated from sample weights before and after drying  
130       for 48 h at 60 °C, and by using the equation: forage yield (kg DM ha<sup>-1</sup>) = kg dry  
131       sample ÷ 0.23 m<sup>2</sup> ÷ 0.0001. The DM was calculated by using the equation: DM  
132       (% as-fed) = kg dry sample ÷ kg fresh sample × 100. Group means for forage  
133       yield and DM measurements were used to obtain a single measurement for each  
134       group within paddock and collection date for WR (n = 48) and WW (n = 48).

## 135 **Forage quality and fatty acids**

136       One sample from each group within paddock and collection date was  
137       randomly selected for forage quality analysis for WR (n = 48) and WW (n = 48),  
138       and a second sample from each group within paddock and collection date was  
139       randomly selected for FA analysis for WR (n = 48) and WW (n = 48). Dried  
140       forage samples were ground through a 2 mm screen (Model 4, Wiley Mill®,  
141       Thomas Scientific, Minneapolis, MN, USA) and were stored in WhirlPak® bags  
142       before analysis. Forage quality was determined by near-infrared reflectance



143 spectroscopy using standard equations for forage quality characteristics (Rock  
144 River Laboratory, Inc., Watertown, WI, USA). Acid detergent fiber (**ADF**) and  
145 neutral detergent fiber (**NDF**) were quantified using Ankom™ procedures (Ankom  
146 A2000™, Methods 12 and 13) and total tract NDF digestibility (**TTNDFD**) was  
147 quantified using in vitro procedures. Minerals and FAs were determined by  
148 inductively coupled plasma optical emission spectrometry and gas  
149 chromatographic analysis of FA methyl esters (Eurofins BioDiagnostics, Inc.,  
150 River Falls, WI), respectively. The FA results are reported as a concentration of  
151 total fat, and the remaining results are reported as a percent of forage DM.

## 152 **Statistical analysis**

153 The MIXED procedure of SAS/STAT® software [20] was used for all  
154 statistical analyses. Fixed factor variables were forage, date, and their  
155 interaction. Steer group nested in paddock was a random subject effect and date  
156 was repeated using the spatial power covariance structure. Results are reported  
157 as least squares means and standard errors. To determine the linear effect of  
158 date on FAs, separate models were built for each outcome and date was a  
159 continuous covariate.

## 160 **Results and discussion**

### 161 **Forage yield and dry matter**

162 Forage yield for WR was greater ( $P < 0.05$ ) than WW (Table 2), which is  
163 consistent with results of previous studies [21–24]. However, the actual yield

values are inconsistent with previous studies [21–25]. Variation in yield is mainly due to factors, like year, location, and environment, which differ between studies and affect the yield of small grain forages [21,24,26,27]. Little precipitation and lack of irrigation during the growing period [28], lack of fertilizer [29], and the moderate stocking rate for grazing [30] may have contributed to a lower yield than expected.

**Table 2. Yield, quality, and mineral composition of winter rye and winter wheat forages.**

| Measurement <sup>a</sup>      | Winter rye | Winter wheat | SE <sup>b</sup> | P-value |      |       |
|-------------------------------|------------|--------------|-----------------|---------|------|-------|
|                               |            |              |                 | Forage  | Date | F x D |
| Yield, kg DM ha <sup>-1</sup> | 2840.      | 2571.        | 82.             | *       | ***  | ***   |
| Dry matter, % as-fed          | 21.0       | 23.2         | 0.43            | *       | ***  |       |
| Crude protein, % DM           | 17.6       | 19.3         | 0.30            | **      | ***  | *     |
| Fat, % DM                     | 2.67       | 2.41         | 0.017           | ***     | ***  |       |
| NDF, % DM                     | 47.8       | 44.9         | 0.35            | ***     | ***  | ***   |
| ADF, % DM                     | 30.1       | 28.9         | 0.30            | *       | ***  | *     |
| TTNDFD, % NDF                 | 56.3       | 56.3         | 0.65            |         | ***  |       |
| NEg                           | 0.446      | 0.440        | 0.0035          |         | ***  | *     |
| NE <sub>m</sub>               | 0.718      | 0.713        | 0.0038          |         | ***  | *     |
| TDN, % DM                     | 65.7       | 65.4         | 0.18            |         | ***  | *     |
| Starch, % DM                  | 4.08       | 4.22         | 0.12            |         | ***  | ***   |
| Calcium, % DM                 | 0.356      | 0.363        | 0.010           |         | ***  | **    |
| Phosphorus, % DM              | 0.345      | 0.240        | 0.011           | ***     | ***  | *     |
| Potassium, % DM               | 2.84       | 2.69         | 0.050           | *       | ***  | *     |
| Magnesium, % DM               | 0.145      | 0.136        | 0.0027          | *       | ***  | *     |

Least square means and standard errors for the grazing period (25 April – 10 June 2016).

NDF = neutral detergent fiber; ADF = acid detergent fiber; TTNDFD = total tract neutral detergent fiber digestibility; NEg = net energy for gain; NE<sub>m</sub> = net energy for maintenance; TDN = total digestible nutrients; F x D = forage and date interaction

<sup>a</sup>Measurements reported as percent of dry matter; dry matter reported as percent of as-fed; TTNDFD reported as percent of NDF

<sup>b</sup>Standard errors are the same for forages

\*  $P < 0.05$ ; \*\*  $P < 0.001$ ; \*\*\*  $P < 0.0001$

171 In general, WR had greater yield at the start and WW had greater yield in  
172 the latter part of the grazing period (Fig 1). These growth trends are consistent  
173 with the results of previous studies [21,24,26,31].

174 **Fig 1. Forage yield of winter rye and winter wheat for the grazing period.**

175 \*Forages within the same date are different,  $P < 0.05$ .

176 The WW had greater ( $P < 0.05$ ) DM than WR (Table 2), which increased  
177 during the grazing period for both forages (Fig 2). Previous studies agree with  
178 greater DM for WW and an increase in DM during the growing period [23,28].  
179 The abrupt increase in DM at the end of the grazing period may have been  
180 caused by little precipitation in the month of June [28] (Table 1).

181 **Fig 2. Dry matter of winter rye and winter wheat for the grazing period.**

182 \*Forages within the same date are different,  $P < 0.05$ .

183 **Crude protein and fat**

184 The WW had greater ( $P < 0.001$ ) crude protein (**CP**) than WR (Table 2),  
185 which decreased over the grazing period (Fig 3). Previous studies agree with  
186 greater CP for WW than WR [21,26,27] and a general decrease in CP over the  
187 growing period [15,25–28,32]. The CP values are consistent with previous  
188 studies performed in the Midwest region of the USA, which reported CP of 12 –  
189 20% DM for WR [21,26] and 11 – 34% DM for WW [22,25,26].

190 The CP levels were well above the minimum requirement for cattle. The  
191 estimated minimum CP requirement of 12% DM for growing and finishing beef  
192 cattle is based off the estimated net protein requirement for gain of dairy steers  
193 consuming forages of the current study with ADG of 0.87 kg d<sup>-1</sup> using equations

194 from the National Research Council [33]. For dairy cattle, the National Research  
195 Council [34] suggests that maximum milk production is observed at 23% DM of  
196 CP, which is similar to the values of forages in the first weeks of grazing. The  
197 WW forage may be preferred for maximizing milk production. Because CP  
198 decreases over the grazing period, early grazing should be initiated to maximize  
199 protein intake.

### 200 **Fig 3. Crude protein of winter rye and winter wheat for the grazing period.**

201 \*Forages within the same date are different,  $P < 0.05$ .

202 The WR had greater ( $P < 0.0001$ ) fat than WW (Table 2), which decreased  
203 over the grazing period for both forages (Fig 4). These results are similar to  
204 results by Glasser et al. [9], who reported a decrease in fat from fresh pasture  
205 forages as cutting date increased.

### 206 **Fig 4. Fat of winter rye and winter wheat for the grazing period.**

207 \*Forages within the same date are different,  $P < 0.05$ .

## 208 **Fiber and digestibility**

### 209 **Neutral detergent fiber and acid detergent fiber**

210 The WR had greater ( $P < 0.05$ ) NDF and ADF compared to WW (Table 2),  
211 and forages increased in NDF and ADF over the grazing period. Previous studies  
212 reported greater fiber for WR compared to WW [21,27] and an increase in NDF  
213 and ADF with plant maturity [15,25,27,28]. Similar studies performed in the  
214 Midwest region of the USA [21,25] reported NDF of 53 – 67% DM for WR and 38  
215 – 61% DM for WW, and ADF of 28 – 42% DM for WR and 24 – 31% DM for WW.

216 Low precipitation during the current study may have slowed maturation and  
217 decreased fiber production [28]. The forages had similar NDF values at the end  
218 of the grazing period, which is similar to findings by Lauriault and Kirksey [31].  
219 Because research is sparse, the National Research Council does not have  
220 specific recommendations for NDF or ADF of diets for grazing cattle [34].

## 221 **Total tract neutral detergent fiber digestibility**

222 The forages had similar TTNDFD and met the minimum recommended  
223 value of 50% NDF [35], except during the last two weeks of the grazing period  
224 (Fig 5). The decrease in digestibility during the growing period agrees with the  
225 results of previous studies [15,26,28]. Grazing mature WR and WW forages may  
226 not meet TTNDFD recommendations, but they might still be adequate for  
227 grazing.

## 228 **Fig 5. TTNDFD of winter rye and winter wheat for the grazing period.**

229 TTNDFD = total tract neutral detergent fiber digestibility

## 230 **Minerals**

### 231 **Calcium**

232 The forages had similar Calcium (**Ca**) (Table 2), which decreased over the  
233 grazing period (Fig 6). The estimated Ca requirement of 0.40 – 0.5% DM for  
234 growing and finishing beef cattle is based off the estimated net protein  
235 requirement for gain of dairy steers consuming forages of the current study with  
236 ADG of 0.87 kg d<sup>-1</sup> using equations from the National Research Council [33,36].

237 The forages met the Ca requirements for beef cattle in the first half, but were  
 238 deficient in the latter half of the grazing period. For dairy cattle, the National  
 239 Research Council [34] recommends absorbed Ca of 1.22 – 1.45 g kg<sup>-1</sup> of milk  
 240 produced. Since the typical organic dairy cow in the USA produces  
 241 approximately 20 kg d<sup>-1</sup> of milk [37–39] and Ca is approximately 30% available  
 242 for absorption in forages [34], grazing dairy cattle need to consume an estimated  
 243 83.4 – 99.1 g d<sup>-1</sup> of Ca from pasture forages. Vazquez et al. [40] estimated that a  
 244 grazing dairy cow consumes 8.7 – 14.6 kg DM d<sup>-1</sup> of forage. Therefore, the  
 245 estimated Ca requirement in pasture forages for grazing dairy cattle is 0.96 –  
 246 1.15% DM. The forages of the current study were deficient in Ca for dairy cattle,  
 247 so supplemental Ca for grazing lactating dairy cattle is necessary.

#### 248 **Fig 6. Calcium of winter rye and winter wheat for the grazing season.**

249 \*Forages within the same date are different,  $P < 0.05$ .

#### 250 **Phosphorus**

251 The WR had greater ( $P < 0.0001$ ) phosphorus (**P**) than WW (Table 2),  
 252 which decreased over the grazing period (Fig 7). Specifically, WR had greater P  
 253 in the first few weeks of grazing compared to WW. The estimated P requirement  
 254 of 0.16 – 0.21% DM for growing and finishing beef cattle is based off the  
 255 estimated net protein requirement for gain of dairy steers consuming forages of  
 256 the current study with ADG of 0.87 kg d<sup>-1</sup> using equations from the National  
 257 Research Council [33,36]. The forages were above the minimum P requirements  
 258 for beef cattle and did not reach the maximum tolerable level of 0.7% DM during  
 259 the grazing period [33]. However, the forages were lower than the National

260 Research Council [34] recommendation of 0.32% DM for P estimated for  
261 lactating grazing dairy cattle [37–40], especially in the latter half of grazing.  
262 Therefore, supplemental P for lactating dairy cattle is necessary for grazing WW  
263 and for WR after the first few weeks of grazing.

264 **Fig 7. Phosphorus of winter rye and winter wheat for the grazing period.**  
265 \*Forages within the same date are different,  $P < 0.05$ .

## 266 **Potassium**

267 The WR had greater ( $P < 0.05$ ) potassium (**K**) than WW (Table 2), which  
268 decreased during the grazing period (Fig 8). In general, the forages were well  
269 above the National Research Council [33,34] recommendations of 0.42% DM for  
270 lactating grazing dairy cattle and 0.60% DM for growing beef cattle, and was  
271 above the maximum tolerable level of 2 – 3% DM during the beginning of the  
272 grazing period. The forages exceeded the maximum tolerable level at the start of  
273 grazing, which is a concern for lactating dairy cattle. High levels of K may reduce  
274 dry matter intake, milk yield, and inhibit Ca and magnesium (**Mg**) absorption  
275 [34,36]. Therefore, supplemental K is likely unnecessary for cattle grazing WR  
276 and WW forages.

277 **Fig 8. Potassium of winter rye and winter wheat for the grazing period.**  
278 \*Forages within the same date are different,  $P < 0.05$ .

## 279 **Magnesium**

280 The WR had greater ( $P < 0.05$ ) Mg than WW (Table 2), which decreased  
281 over the grazing period (Fig 9). Mg deficiency (hypomagnesemia) is a concern  
282 for pastures with rapidly growing cereal crops in the early spring [36]. Dove et al.

[36] suggested that hypomagnesemia may also be induced by a K:(Mg + Ca) ratio greater than 2.2. Forages met the Mg requirement for beef cattle of 0.10 – 0.20% DM [33,36] for the grazing period; however, the forages were lower than the recommended Mg levels for lactating dairy cattle of 0.35 – 0.40% DM [34,41]. Therefore, supplemental Mg for lactating dairy cattle is necessary for grazing WR and WW forages.

### Fig 9. Magnesium of winter rye and winter wheat for the grazing period.

\*Forages within the same date are different,  $P < 0.05$ .

## Fatty acids

The FAs for WR and WW forages differed ( $P < 0.05$ ) in myristic acid (14:0), linoleic acid (18:2*n*-6), 18:3*n*-3, arachidic acid (20:0), eicosenoic acid (20:1), behenic acid (22:0), and lignoceric acid (24:0) (Table 3). The most abundant was 18:3*n*-3, followed by palmitic acid (16:0) and 18:2*n*-6.

**Table 3. Fatty acids of winter rye and winter wheat forages.**

| Fatty acid, g 100g <sup>-1a</sup> | Winter rye | Winter wheat | SE <sup>b</sup> | P-value |     |       |
|-----------------------------------|------------|--------------|-----------------|---------|-----|-------|
|                                   |            |              |                 | F       | D   | F x D |
| 14:0, myristic                    | 1.68       | 1.00         | 0.075           | ***     | *** |       |
| 16:0, palmitic                    | 17.8       | 17.8         | 0.29            |         | *** | *     |
| 18:0, stearic                     | 1.32       | 1.36         | 0.054           |         |     |       |
| 18:1, oleic                       | 2.30       | 2.39         | 0.12            |         | *   | *     |
| 18:2 <i>n</i> -6, linoleic        | 10.19      | 8.16         | 0.13            | ***     | *** | ***   |
| 18:3 <i>n</i> -3, alpha-linolenic | 63.3       | 66.3         | 0.54            | **      | *** | *     |
| 20:0, arachidic                   | 1.523      | 0.871        | 0.040           | ***     | *** | *     |
| 20:1, eicosenoic                  | 0.1479     | 0.0750       | 0.021           | *       |     |       |
| 22:0, behenic                     | 0.935      | 1.492        | 0.033           | ***     | *** | *     |
| 22:1, erucic                      | 0.1333     | 0.0521       | 0.087           |         |     |       |



|                  |       |       |       |   |   |
|------------------|-------|-------|-------|---|---|
| 24:0, lignoceric | 0.642 | 0.527 | 0.029 | * | * |
|------------------|-------|-------|-------|---|---|

Least square means and standard errors for the grazing period (25 April – 10 June 2016).  
F = forage; D = date; F x D = forage and date interaction  
<sup>a</sup>Fatty acids expressed as g per 100 g of total fat  
<sup>b</sup>Standard errors are the same for forages  
\*  $P < 0.05$ ; \*\*  $P < 0.001$ ; \*\*\*  $P < 0.0001$

296

297 Beef lipid FAs of this study are presented in Phillips et al. [18]. Briefly, beef  
298 lipids from steers grazed on WR and WW differed ( $P < 0.05$ ) in butyric acid (4:0),  
299 tetradecenoic acid (14:1*trans*), myristoleic acid (14:1), hexadecenoic acid  
300 (16:1*trans*), margaroleic acid (17:1), octadecadienoic acid (18:2*trans*), gamma-  
301 linolenic acid (18:3*n*-6), eicosatrienoic acid (20:3*n*-3), arachidonic acid (20:4*n*-6),  
302 heneicosanoic acid (21:0), and docosadienoic acid (22:2*n*-6). The sum of  
303 saturated, *cis*-monounsaturated, *cis*-polyunsaturated, *trans*, and *n*-6 fats were  
304 similar between steers. The steers grazed on WR ( $0.535 \pm 0.018$  g 100g<sup>-1</sup>) had  
305 numerically less ( $P = 0.31$ ) *n*-3 than steers grazed on WW ( $0.562 \pm 0.018$  g 100g<sup>-</sup>  
306 <sup>1</sup>). The differences in FAs of WR and WW forages may have contributed to  
307 differences in beef lipid FAs of steers [7]. However, the duration of grazing  
308 forages (7 weeks) may not have been long enough to investigate the effects of  
309 forages and their contributions to individual FA levels of beef lipids.

310 Table 4 presents the estimated linear effect of date for FAs during the  
311 grazing period for WR and WW forages. For Table 4, significance for WR or WW  
312 terms indicates a linear effect of date, whereas significance for the interaction  
313 term indicates a difference in the effect of date between forages. Thus, the 14:0,  
314 erucic acid (**22:1**), and 24:0 increased ( $P < 0.05$ ) during the grazing period, and  
315 the effect of date was similar for forages. The effect of date differed ( $P < 0.05$ )

316 between forages for 16:0, oleic acid (**18:1**), 18:2*n*-6, 18:3*n*-3, and 20:0. The 18:1  
317 increased ( $P < 0.0001$ ) in WW, but did not change during the grazing period for  
318 WR. The 20:0 decreased 1.41 times more ( $P < 0.05$ ) per d for WR compared to  
319 WW. There was no effect of date for stearic acid (**18:0**), 20:1, and 22:0 during the  
320 grazing period.  
321

**Table 4. Effect of date on fatty acids of winter rye and winter wheat forages.**

| Fatty acid, mg 100g <sup>-1</sup> d <sup>-1a</sup> | Winter rye | Winter wheat | SE <sup>b</sup> | P-value |     |       |
|----------------------------------------------------|------------|--------------|-----------------|---------|-----|-------|
|                                                    |            |              |                 | WR      | WW  | F x D |
| 14:0, myristic                                     | 33.5       | 18.8         | 5.5             | ***     | **  |       |
| 16:0, palmitic                                     | 21.8       | 147.6        | 25.2            |         | *** | **    |
| 18:0, stearic                                      | -2.52      | 6.08         | 4.2             |         |     |       |
| 18:1, oleic                                        | -5.14      | 52.86        | 10.4            |         | *** | **    |
| 18:2 <i>n</i> -6, linoleic                         | 56.1       | 122.0        | 10.3            | ***     | *** | ***   |
| 18:3 <i>n</i> -3, alpha-linolenic                  | -97.8      | -340.9       | 46.7            | *       | *** | **    |
| 20:0, arachidic                                    | -20.69     | -8.58        | 3.7             | ***     | *   | *     |
| 20:1, eicosenoic                                   | 2.06       | 1.41         | 1.4             |         |     |       |
| 22:0, behenic                                      | -1.37      | -4.81        | 3.1             |         |     |       |
| 22:1, erucic                                       | 11.47      | 2.26         | 5.7             | *       |     |       |
| 24:0, lignoceric                                   | 4.32       | 4.24         | 2.0             | *       | *   |       |

Change in fatty acid concentration per one d increase during the grazing period (25 April – 10 June 2016).

WR = winter rye; WW = winter wheat; F x D = forage and date interaction

<sup>a</sup>Estimates expressed as mg of fatty acid per 100 g of fat per d

<sup>b</sup>Standard errors are the same for forages

\*  $P < 0.05$ ; \*\*  $P < 0.001$ ; \*\*\*  $P < 0.0001$

322

### 323 **Alpha-linolenic acid, 18:3 $n$ -3**

324           The WW was 4.7% greater ( $P < 0.001$ ) in 18:3 $n$ -3 concentration compared  
325 to WR. The 18:3 $n$ -3 in WW decreased 2.49 times more ( $P < 0.001$ ) per d  
326 compared to WR (Table 4). Clapham et al. [42] reported 18:3 $n$ -3 of 65 – 69 g  
327 100g<sup>-1</sup> for triticale (a hybrid of rye [*Secale*] and wheat [*Triticum*]), which is similar  
328 to values for WW of the current study. The study [42] also reported a general  
329 decrease in 18:3 $n$ -3 with plant maturity, which is similar to forages of the current  
330 study. In a meta-analysis, Glasser et al. [9] reported a decrease in 18:3 $n$ -3  
331 concentration as pasture forages matured. Fig 10 depicts the decrease in 18:3 $n$ -  
332 3 for forages during the grazing period.

333 **Fig 10. Alpha-linolenic acid (18:3 $n$ -3) of winter rye and winter wheat for the**  
334 **grazing period.**

335 \*Forages within the same date are different,  $P < 0.05$ .

### 336 **Palmitic acid, 16:0**

337           The forages had similar 16:0 concentration. The 16:0 increased ( $P <$   
338 0.0001) in WW; however, there was no effect of date for WR (Table 4). That is,  
339 the 16:0 increased in WW and did not radically change in WR during the grazing  
340 period. Clapham et al. [42] reported lower 16:0 of 13 – 15 g 100g<sup>-1</sup> for triticale.  
341 The lack of additional nitrogen fertilizer used in the current study may have  
342 increased the 16:0 in forages [9]. In a meta-analysis, Glasser et al. [9] reported  
343 an increase in 16:0 concentrations as pasture forages matured. Temporal  
344 changes in 16:0 are illustrated in Fig 11.

### 345 **Fig 11. Palmitic acid (16:0) of winter rye and winter wheat for the grazing** 346 **period.**

347 \*Forages within the same date are different,  $P < 0.05$ .

### 348 **Linoleic acid, 18:2 $n$ -6**

349 The WR had 24.9% greater ( $P < 0.0001$ ) 18:2 $n$ -6 concentration than WW.  
350 The 18:2 $n$ -6 increased 1.17 times more ( $P < 0.0001$ ) per d for WW compared to  
351 WR (Table 4). Clapham et al. [42] reported greater 18:2 $n$ -6 values of 12 – 13 g  
352 100g<sup>-1</sup> and a similar increase in 18:2 $n$ -6 as triticale matured. Fig 12 illustrates the  
353 increase in 18:2 $n$ -6 for forages during the grazing period. The forages differed in  
354 the first half of grazing, but were similar in the latter half of grazing.

### 355 **Fig 12. Linoleic acid (18:2 $n$ -6) of winter rye and winter wheat for the grazing** 356 **period.**

357 \*Forages within the same date are different,  $P < 0.05$ .

### 358 **Comparison to perennial pasture forages**

359 The grazing season for perennial pastures in the upper Midwest of the  
360 USA is late-May – October. The small grain forages of the current study  
361 extended the grazing season by approximately one month earlier. A study by  
362 Ruh [43] conducted at the WCROC assessed the forage quality of cool season  
363 perennial forages during the grazing season (June – October 2017). Ruh [43]  
364 reported 343 – 612 kg DM ha<sup>-1</sup> less in average yield and 3.7 – 5.4% DM greater  
365 CP for perennial forages compared to the small grain forages of the current  
366 study. The study [43] also reported greater NDF (49.6% DM), ADF (32.2% DM),  
367 and lower TTNDFD (54.6% NDF) for perennial pastures, and greater Ca (0.67%

DM), K (3.10% DM), and Mg (0.23% DM) compared to the small grain forages of the current study. Perennial forages had similar P (0.33% DM) compared to WR, and greater P compared to WW of the current study. Therefore, the vegetative stages of WR and WW pasture forages may provide an abundance of biomass and similar nutritional quality as perennial pastures for grazing, while extending the grazing season.

A meta-analysis of FAs in grasses performed by Glasser et al. [9] reported means for 16:0 (16.9 g 100g<sup>-1</sup>), 18:2*n*-6 (15.8 g 100g<sup>-1</sup>), and 18:3*n*-3 (52.6 g 100g<sup>-1</sup>) in alfalfa, red clover, white clover, and multi-species mixed grasses. Glasser et al. [9] reported similar 16:0 (16.9 g 100g<sup>-1</sup>), greater 18:2*n*-6 (15.8 g 100g<sup>-1</sup>), and lower 18:3*n*-3 (52.6 g 100g<sup>-1</sup>) than forages of the current study. The greater 18:3*n*-3 found in the WR and WW of the current study is preferred since dietary 18:3*n*-3 increases *n*-3 FAs in the meat and milk of cattle. Therefore, grazing cattle on WR and WW forages may even enhance the FA profiles of beef and dairy products, potentially benefitting producers and consumers.

## Conclusions

Based on results from this study and the previous supplemental study by Phillips et al. [18], winter rye and winter wheat forages are viable options for cattle grazing in the early spring and summer in the Midwest of the USA. Results suggested that winter rye might offer more herbage mass in the early spring at the expense of lower crude protein and 18:3*n*-3 concentration compared to winter wheat. The greater 18:3*n*-3 concentration for winter wheat may contribute

390 to healthier beef and milk fatty acids. In general, crude protein, digestibility,  
 391 minerals, and alpha-linolenic acid decreased, and fiber and linoleic acid  
 392 increased during the grazing period. Therefore, results of this study suggest that  
 393 producers should initiate early grazing in the spring to maximize digestibility,  
 394 protein, and alpha-linolenic acid intake while the small grain forages are  
 395 immature. To mitigate mineral imbalance, free-choice minerals formulated for  
 396 pasture grazing must be offered to meet mineral demands. With fatty acids of  
 397 beef and dairy products becoming a critical part of consumer choice and health,  
 398 this study also showed that alpha-linolenic acid is abundant in winter rye and  
 399 winter wheat forages, which could contribute to healthier milk and beef products.

## 400 **Acknowledgements**

401 The authors express gratitude to Darin Huot and staff at WCROC for their  
 402 assistance in data collection and care of animals. This project was supported by  
 403 the National Institute of Food and Agriculture, United States Department of  
 404 Agriculture, under award number 2014-51300-22541.

405

## References

1. Umberger WJ, Boxall PC, Lacy RC. Role of credence and health information in determining us consumers' willingness-to-pay for grass-finished beef. *Aust J Agric Resour Econ*. 2009 Sep 21;53(4):603–23.
2. Kearney J. Food consumption trends and drivers. *Philos Trans R Soc Lond B Biol Sci*. 2010 Sep 27;365(1554):2793–807.
3. Daley CA, Abbott A, Doyle PS, Nader GA, Larson S. A review of fatty acid profiles and antioxidant content in grass-fed and grain-fed beef. *Nutr J*. 2010 Mar 10;9(1):10.
4. Średnicka-Tober D, Barański M, Seal C, Sanderson R, Benbrook C, Steinshamn H, et al. Composition differences between organic and conventional meat: a systematic literature review and meta-analysis. *Br J Nutr*. 2016 Mar 28;115(6):994–1011.
5. Średnicka-Tober D, Barański M, Seal CJ, Sanderson R, Benbrook C, Steinshamn H, et al. Higher PUFA and n-3 PUFA, conjugated linoleic acid,  $\alpha$ -tocopherol and iron, but lower iodine and selenium concentrations in organic milk: a systematic literature review and meta- and redundancy analyses. *Br J Nutr*. 2016 Mar 28;115(6):1043–60.
6. Benbrook CM, Davis DR, Heins BJ, Latif MA, Leifert C, Peterman L, et al. Enhancing the fatty acid profile of milk through forage-based rations, with nutrition modeling of diet outcomes. *Food Sci Nutr*. 2018 Feb 28;6(3):681–700.

- 428 7. Scollan N, Hocquette J-F, Nuernberg K, Dannenberger D, Richardson I,  
429 Moloney A. Innovations in beef production systems that enhance the  
430 nutritional and health value of beef lipids and their relationship with meat  
431 quality. *Meat Sci.* 2006 Sep;74(1):17–33.
- 432 8. Boufaïed H, Chouinard PY, Tremblay GF, Petit H V, Michaud R, Bélanger  
433 G. Fatty acids in forages. I. Factors affecting concentrations. *Can J Anim*  
434 *Sci.* 2003 Sep;83(3):501–11.
- 435 9. Glasser F, Doreau M, Maxin G, Baumont R. Fat and fatty acid content and  
436 composition of forages: a meta-analysis. *Anim Feed Sci Technol.* 2013  
437 Sep 23;185(1–2):19–34.
- 438 10. *Livestock Feed*, 7 C.F.R. Sect. 205.237 (2010).
- 439 11. Heins BJ. Feeding the organic dairy herd during 2013 and beyond. In: *Pre-*  
440 *Symposium Improving Feed Efficiency in Dairy Cattle*, 4-State Dairy  
441 *Nutrition Conference.* 2013. p. 44–50.
- 442 12. Gwin L. Scaling-up sustainable livestock production: innovation and  
443 challenges for grass-fed beef in the US. *J Sustain Agric.* 2009  
444 Feb;33(2):189–209.
- 445 13. Dabney SM, Delgato JA, Reeves DW. Using winter cover crops to improve  
446 soil and water quality. *Commun Soil Sci Plant Anal.* 2001;32(7–8):1221–  
447 50.
- 448 14. Li Y, Allen VG, Hou F, Chen J, Brown CP. Steers grazing a rye cover crop  
449 influence growth of rye and no-till cotton. *Agron J.* 2013 Oct;105(6):1571–  
450 80.



- 451 15. Collar C, Aksland G. Harvest stage effects on yield and quality of winter  
452 forage. In: Putnam D, editor. 31st California Alfalfa and Forage  
453 Symposium. Modesto (CA): University of California Cooperative Extension,  
454 University of California, Davis; 2001. p. 10.
- 455 16. Heins BJ, Hansen LB, Hazel AR, Seykora AJ, Johnson DG, Linn JG. Birth  
456 traits of pure Holstein calves versus Montbeliarde-sired crossbred calves. J  
457 Dairy Sci. 2010 May;93(5):2293–9.
- 458 17. Hayden J, Rocker S, Phillips H, Heins B, Smith A, Delate K. The  
459 importance of social support and communities of practice: farmer  
460 perceptions of the challenges and opportunities of integrated crop-livestock  
461 systems on organically managed farms in the Northern US. Sustainability.  
462 2018 Dec 5;10(12):4606.
- 463 18. Phillips HN, Heins BJ, Delate K, Turnbull R. Impact of grazing dairy steers  
464 on winter rye (*Secale cereale*) versus winter wheat (*Triticum aestivum*) and  
465 effects on meat quality, fatty acid and amino acid profiles, and consumer  
466 acceptability of organic beef. PLoS One. 2017 Nov 3;12(11):e0187686.
- 467 19. Bjorklund EA, Heins BJ, DiCostanzo A, Chester-Jones H. Growth, carcass  
468 characteristics, and profitability of organic versus conventional dairy beef  
469 steers. J Dairy Sci. 2014 Mar;97(3):1817–27.
- 470 20. SAS/STAT Software. Version 9.4 [software]. SAS Institute Inc. 2014 [cited  
471 2017 Apr 7].
- 472 21. Islam MA, Obour AK, Nachtman JJ, Baumgartner RE, Saha MC. Small  
473 grains have forage production potential and nutritive value in Central High

- 474 Plains of Wyoming. Forage & Grazinglands. 2013 Jan 21;11(1):10.
- 475 22. Holman JD, Roberts T, Maxwell S. 2015 Kansas winter annual forage  
476 variety trial. Kansas Agricultural Experiment Station Research Reports.  
477 2016 Aug;2(7):4.
- 478 23. Keles G, Ates S, Coskun B, Alatas MS, Isik S. Forage yields and feeding  
479 value of small grain winter cereals for lambs. J Sci Food Agric. 2016 Jan  
480 14;96(12):4168–77.
- 481 24. Kim K-S, Anderson JD, Webb SL, Newell MA, Butler TJ. Variation of winter  
482 forage production in four small grain species-oat, rye, triticale and wheat.  
483 Pak J Bot. 2017 Jan;49(2):553–9.
- 484 25. Grev AM, Sheaffer CC, DeBoer ML, Catalano DN, Martinson KL.  
485 Preference, yield, and forage nutritive value of annual grasses under horse  
486 grazing. Agron J. 2017 May 11;109(4):1561–72.
- 487 26. Moyer JL, Coffey KP. Forage quality and production of small grains  
488 interseeded into bermudagrass sod or grown in monoculture. Agron J.  
489 2000 Jul;92(4):748–53.
- 490 27. Geren H. Dry matter yield and silage quality of some winter cereals  
491 harvested at different stages under Mediterranean climate conditions. Turk  
492 J F Crop. 2014 Jan;19(2):197–202.
- 493 28. Carmi A, Aharoni Y, Edelstein M, Umiel N, Hagiladi A, Yosef E, et al.  
494 Effects of irrigation and plant density on yield, composition and in vitro  
495 digestibility of a new forage sorghum variety, Tal, at two maturity stages.  
496 Anim Feed Sci Technol. 2006 Nov 15;131(1–2):120–32.

- 497 29. Mayland HF, Molloy LF, Collie TW. Higher fatty acid composition of  
498 immature forages as affected by N fertilization. *Agron J.* 1976  
499 Nov;68(6):979–82.
- 500 30. Patton BD, Dong X, Nyren PE, Nyren A. Effects of grazing intensity,  
501 precipitation, and temperature on forage production. *Rangel Ecol Manag.*  
502 2007 Nov;60(6):656–65.
- 503 31. Lauriault LM, Kirksey RE. Yield and nutritive value of irrigated winter cereal  
504 forage grass-legume intercrops in the Southern High Plains, USA. *Agron J.*  
505 2004 Mar;96(2):352–8.
- 506 32. Orloff S, Drake D. A grazing and haying system with winter annual  
507 grasses. In: Putnam D, editor. 31st California Alfalfa and Forage  
508 Symposium. Modesto (CA): University of California Cooperative Extension,  
509 University of California, Davis; 2001. p. 7.
- 510 33. National Research Council. Nutrient requirements of beef cattle. 8th ed.  
511 Washington (DC): The National Academies Press; 2016.
- 512 34. National Research Council. Nutrient requirements of dairy cattle. 7th ed.  
513 Washington (DC): The National Academies Press; 2001.
- 514 35. Combs DK. Total tract NDF digestibility (TTNDFD) guidelines. In: 2013  
515 Cornell Nutrition Conference. Syracuse (NY); 2013. p. 13.
- 516 36. Dove H, Masters DG, Thompson AN. New perspectives on the mineral  
517 nutrition of livestock grazing cereal and canola crops. *Anim Prod Sci.* 2016  
518 Jul 27;56(8):1350–60.
- 519 37. Sato K, Bartlett PC, Erskine RJ, Kaneene JB. A comparison of production

- 520 and management between Wisconsin organic and conventional dairy
- 521 herds. *Livest Prod Sci.* 2005 Apr 15;93(2):105–15.
- 522 38. Richert RM, Cicconi KM, Gamroth MJ, Schukken YH, Stiglbauer KE,
- 523 Ruegg PL. Risk factors for clinical mastitis, ketosis, and pneumonia in dairy
- 524 cattle on organic and small conventional farms in the United States. *J Dairy*
- 525 *Sci.* 2013 Jul;96(7):4269–85.
- 526 39. Sorge US, Moon R, Wolff LJ, Michels L, Schroth S, Kelton DF, et al.
- 527 Management practices on organic and conventional dairy herds in
- 528 Minnesota. *J Dairy Sci.* 2016 Apr;99(4):3183–92.
- 529 40. Vazquez OP, Smith TR. Factors affecting pasture intake and total dry
- 530 matter intake in grazing dairy cows. *J Dairy Sci.* 2000 Oct;83(10):2301–9.
- 531 41. Goff JP. Macromineral physiology and application to the feeding of the
- 532 dairy cow for prevention of milk fever and other periparturient mineral
- 533 disorders. *Anim Feed Sci Technol.* 2006 Mar 9;126(3–4):237–57.
- 534 42. Clapham WM, Foster JG, Neel JPS, Fedders JM. Fatty acid composition of
- 535 traditional and novel forages. *J Agric Food Chem.* 2005 Nov
- 536 25;53(26):10068–73.
- 537 43. Ruh KE. Comparison of two different grazing systems incorporating cool
- 538 and warm season forages for organic dairy cattle. M. Sc. Thesis, The
- 539 University of Minnesota. 2017. Available from:
- 540 <http://hdl.handle.net/11299/185550>.

541

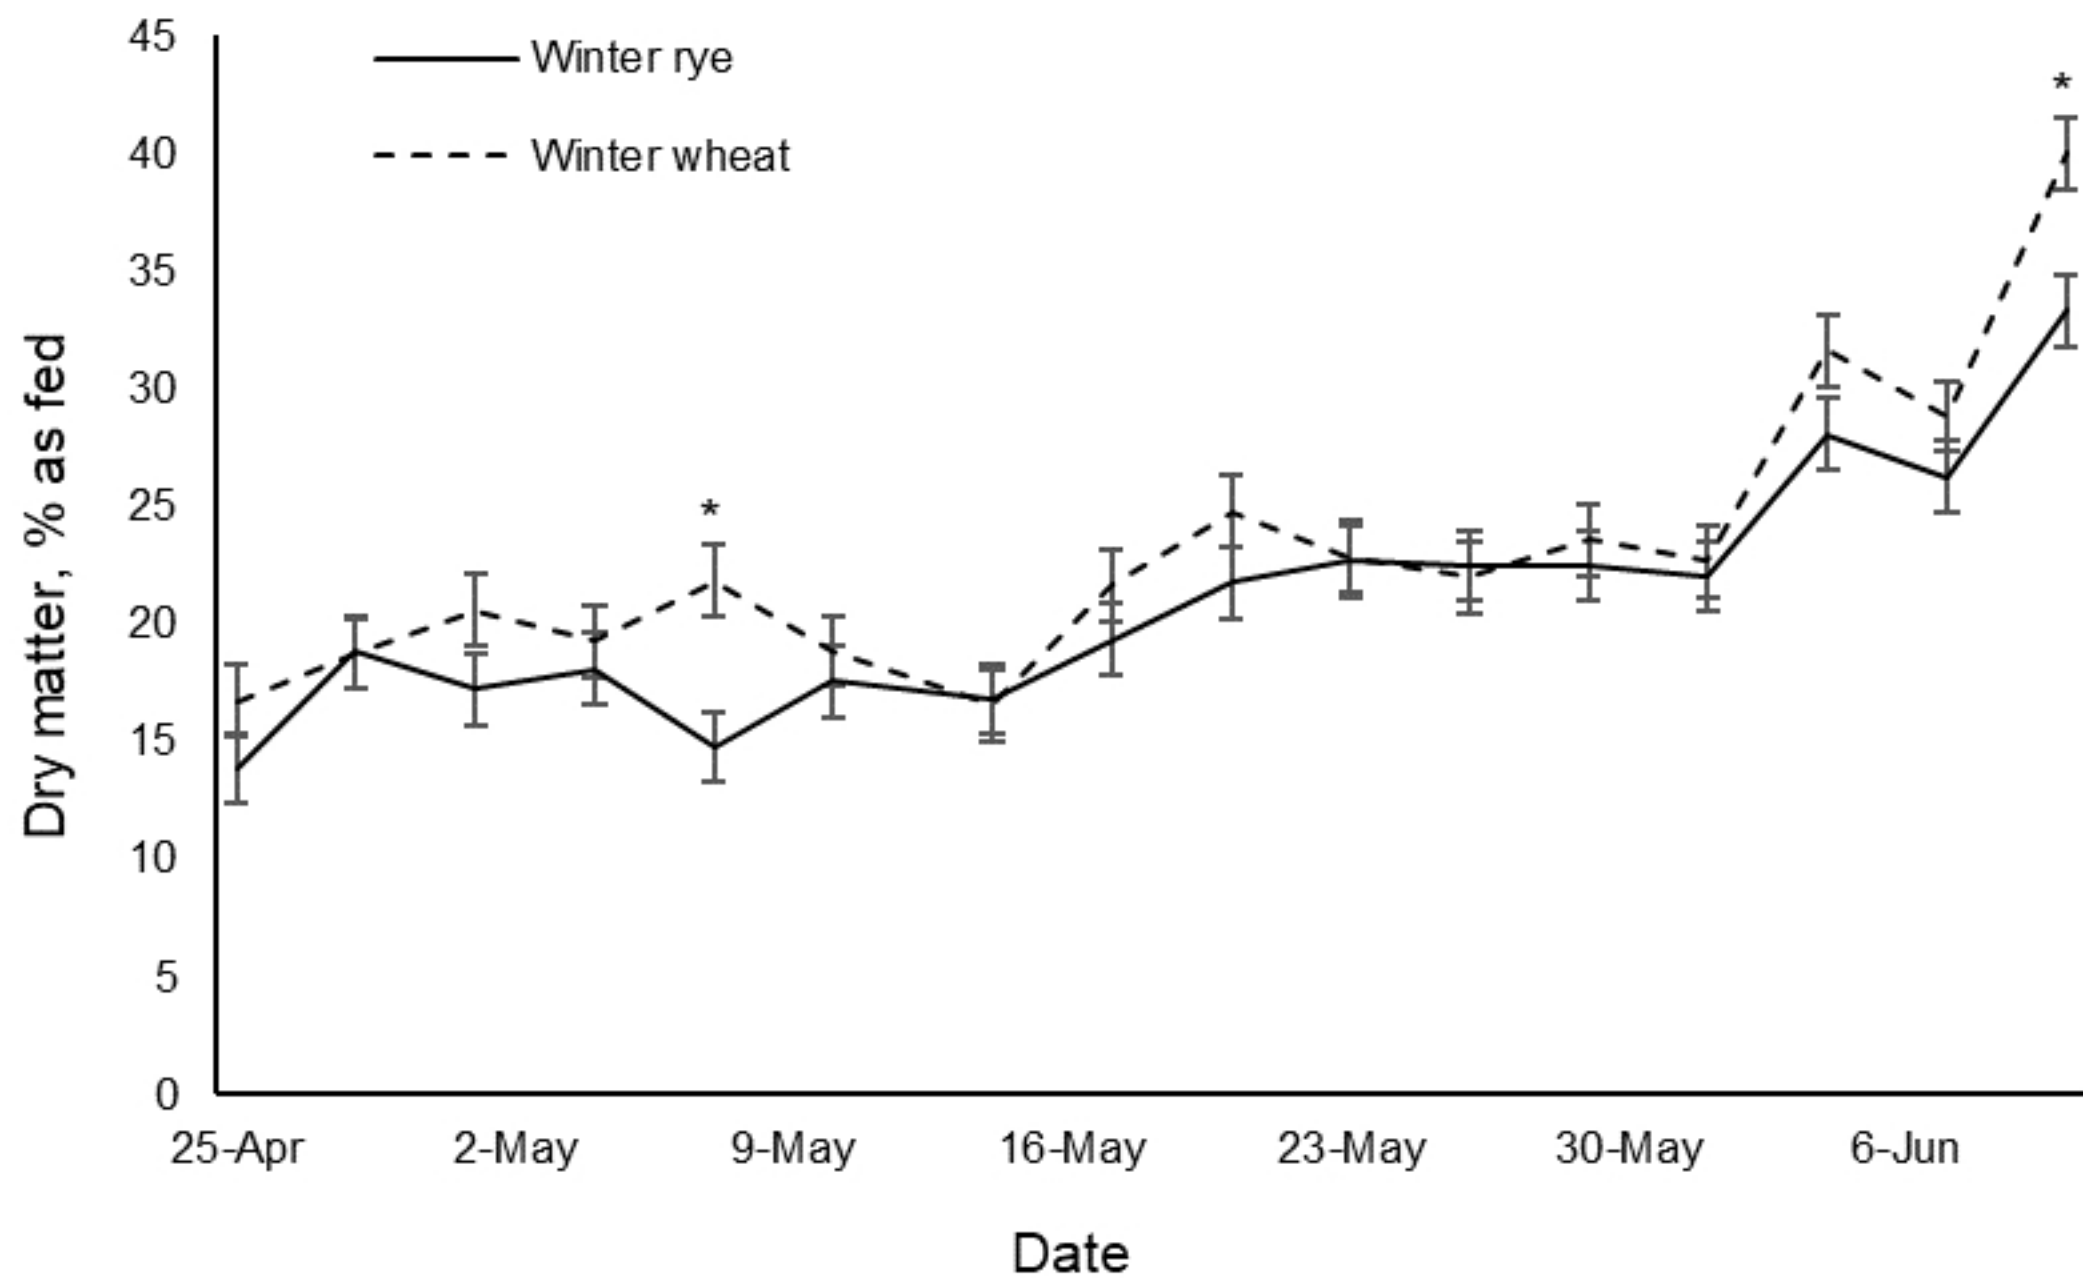

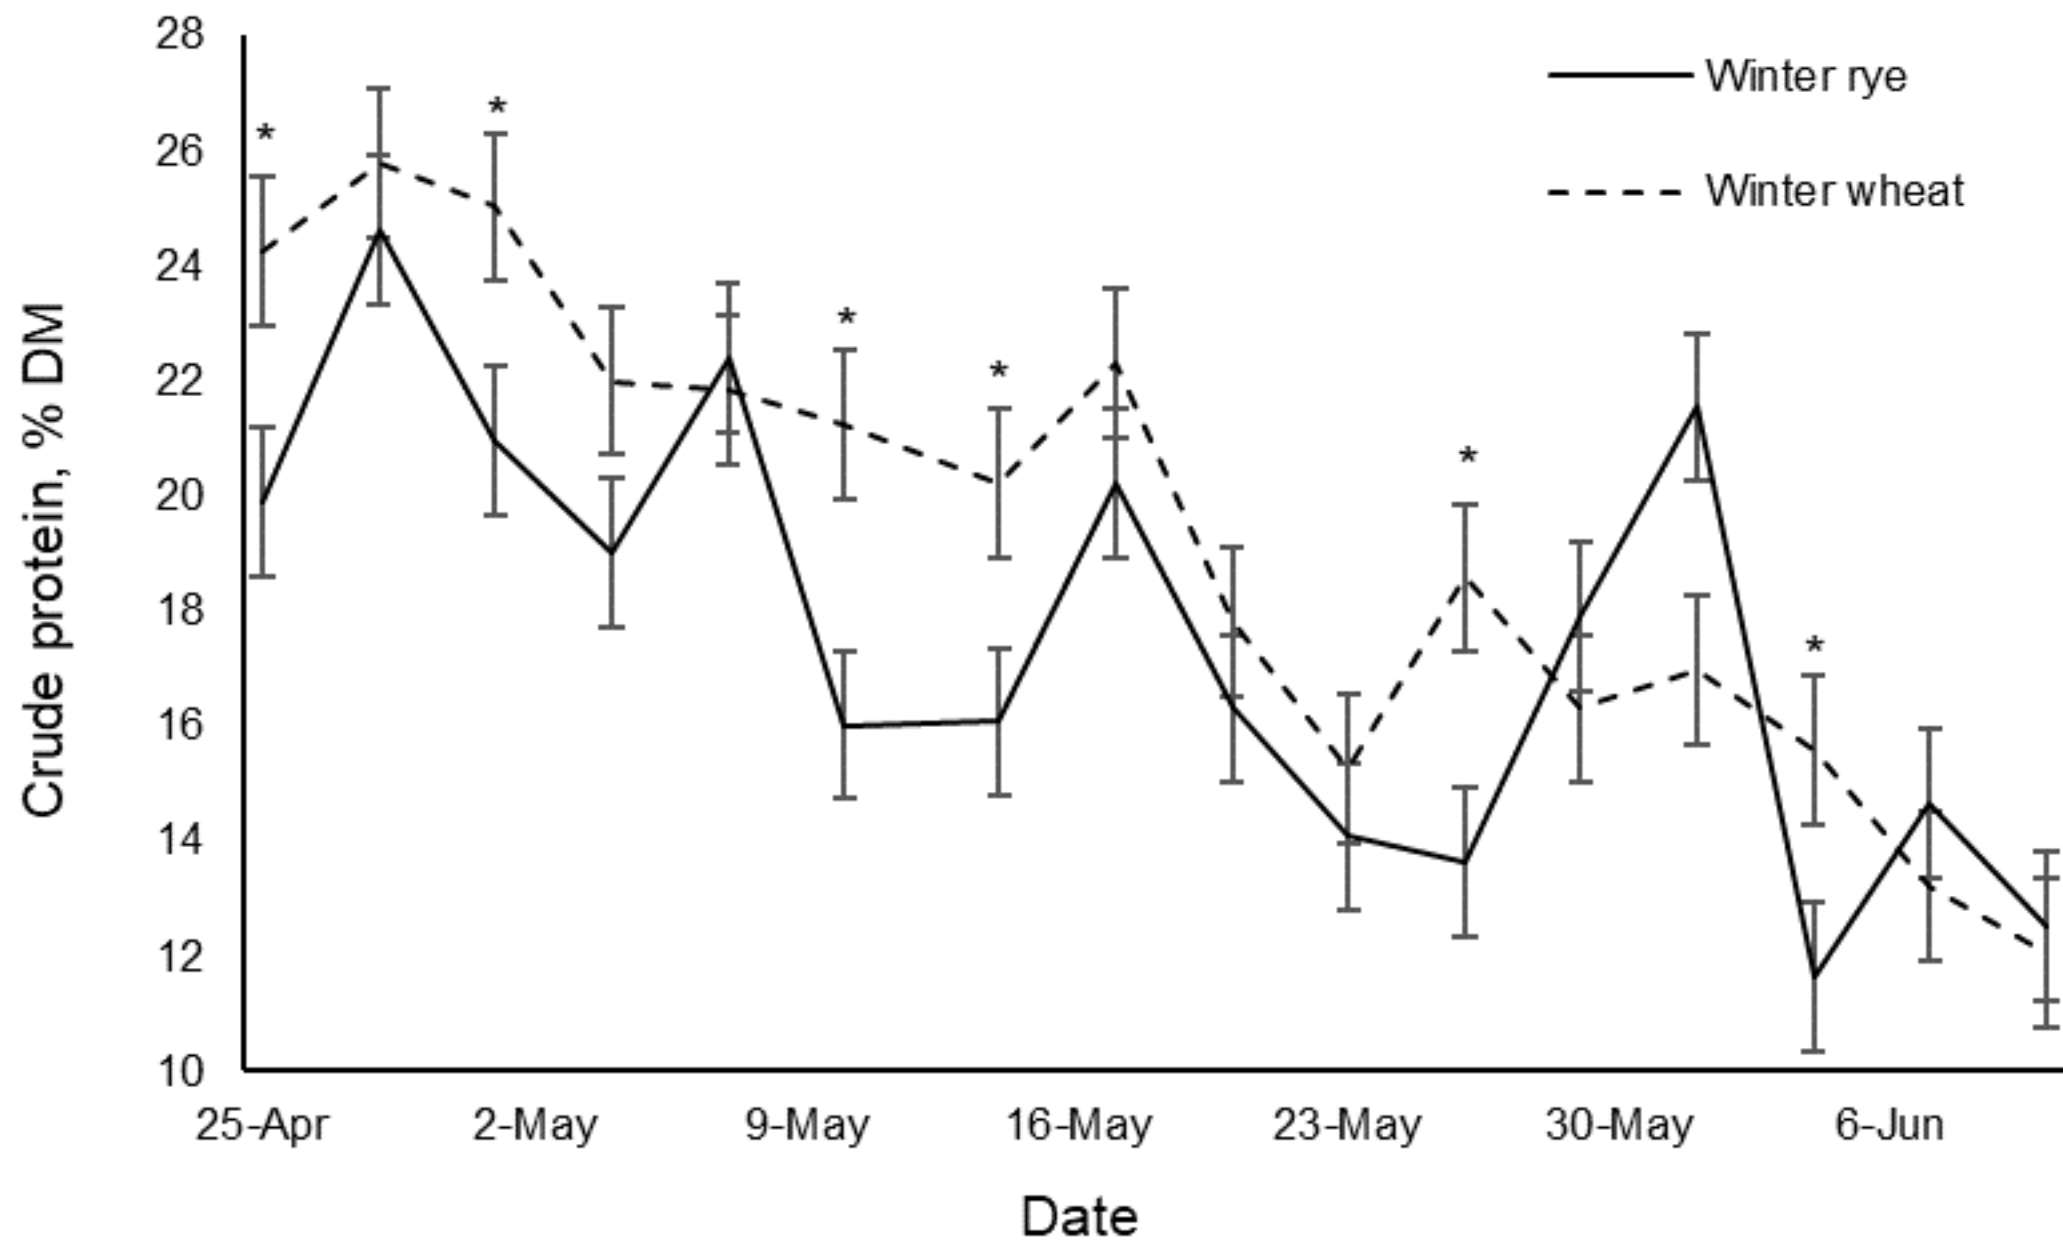

Fat, % DM

— Winter rye

- - - Winter wheat

3.50  
3.25  
3.00  
2.75  
2.50  
2.25  
2.00

25-Apr

2-May

9-May

16-May

23-May

30-May

6-Jun

Date

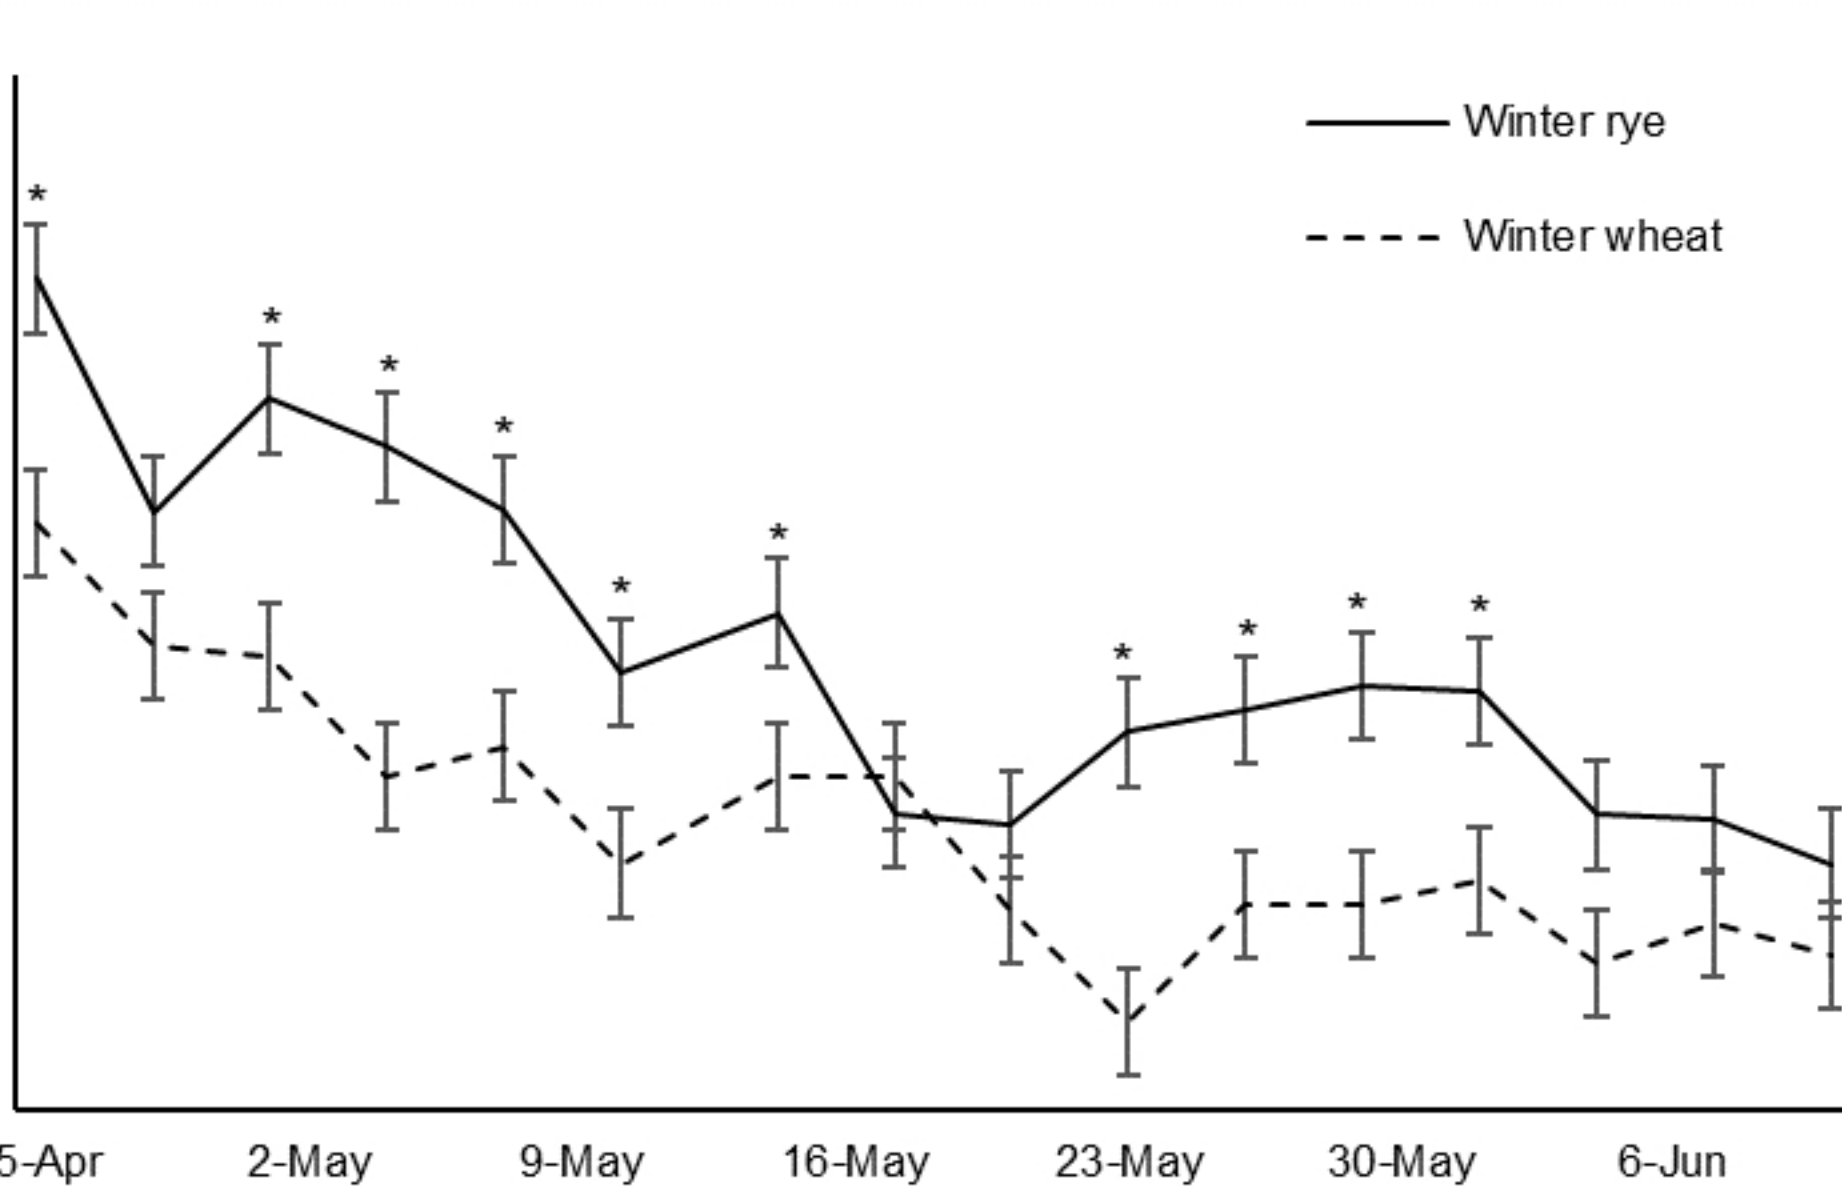

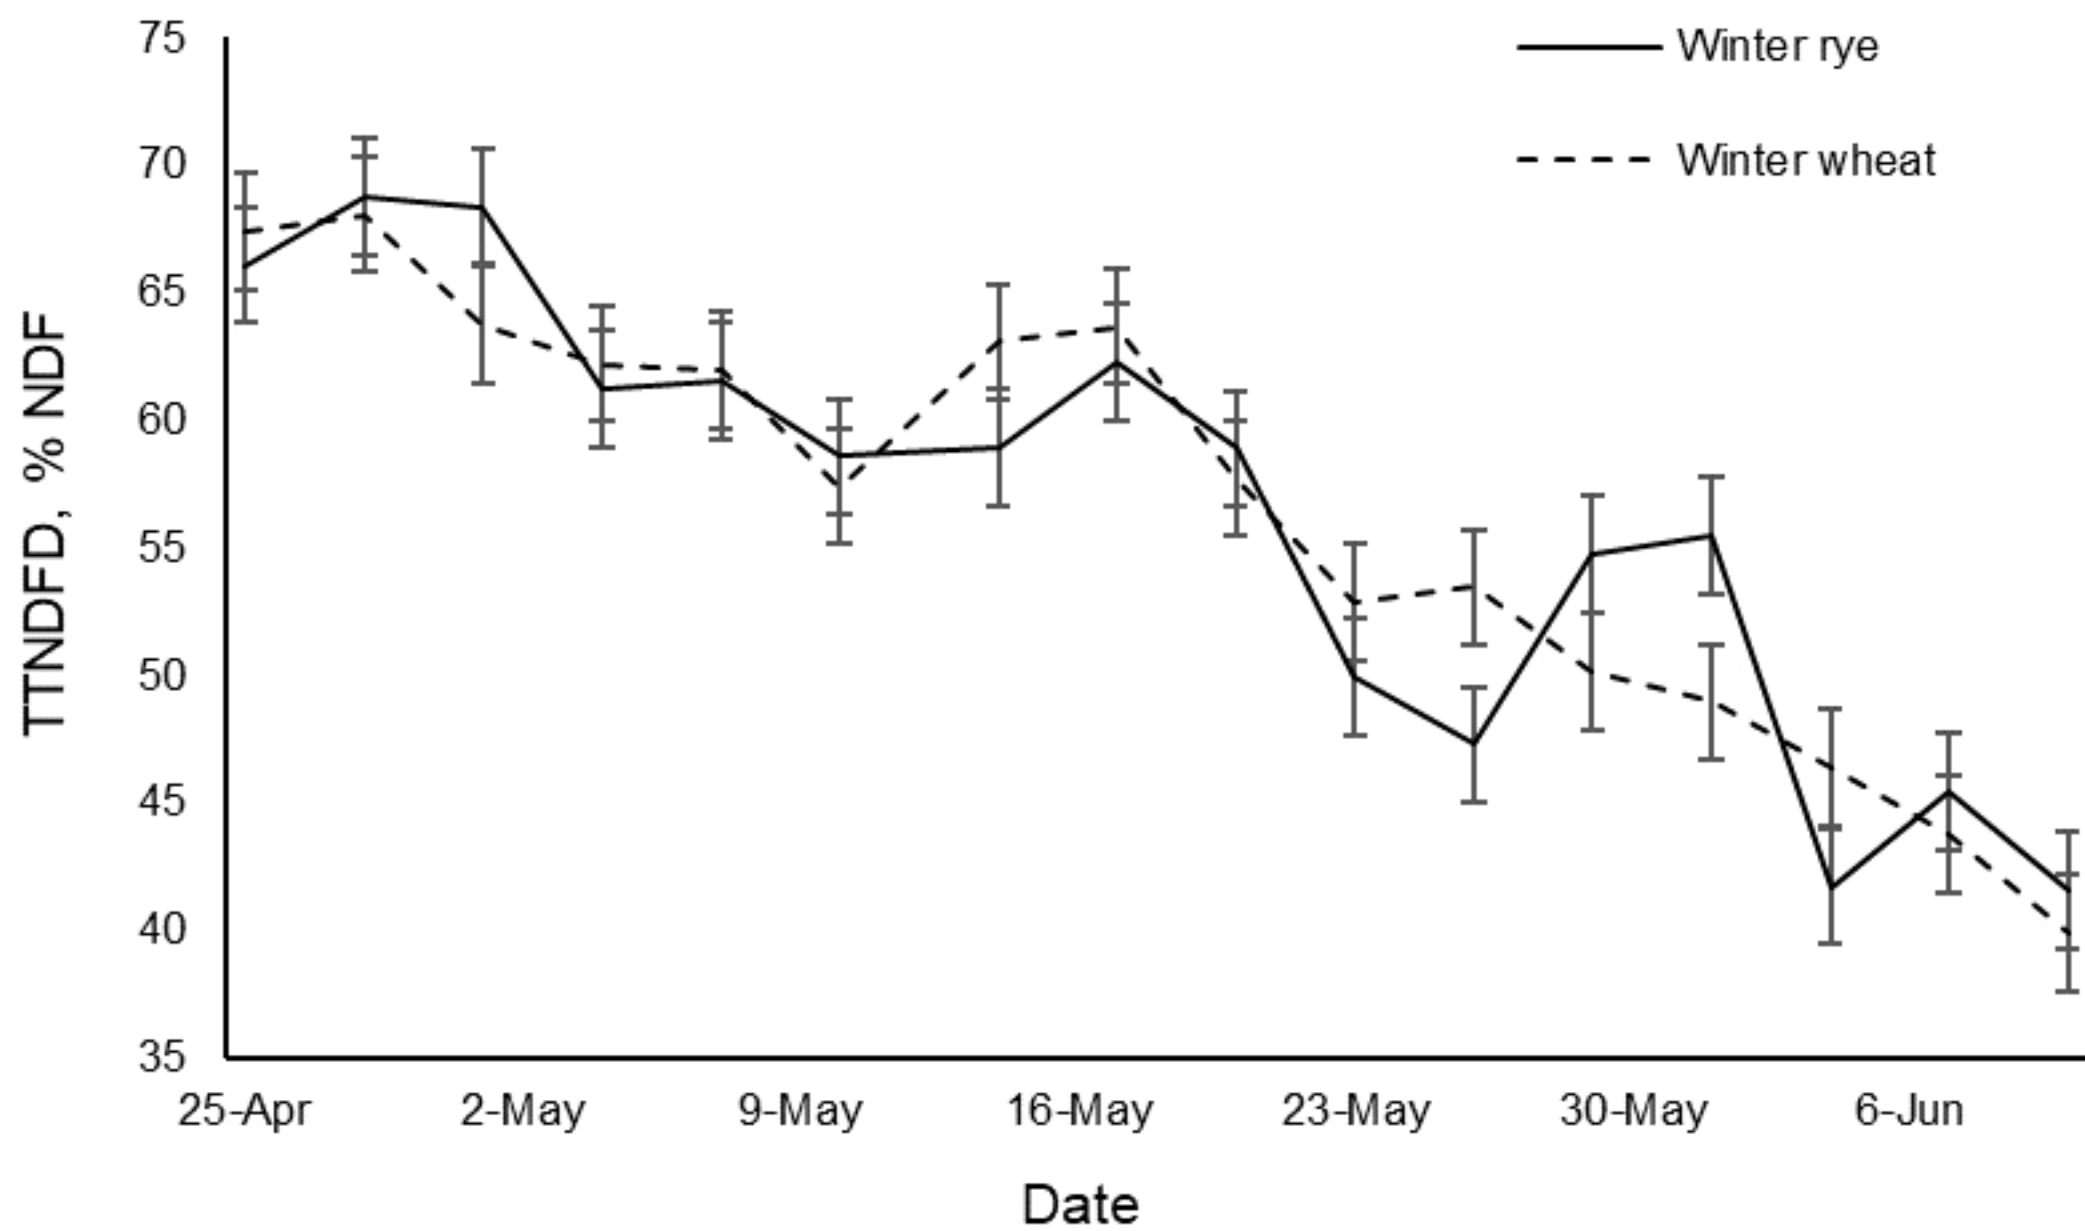



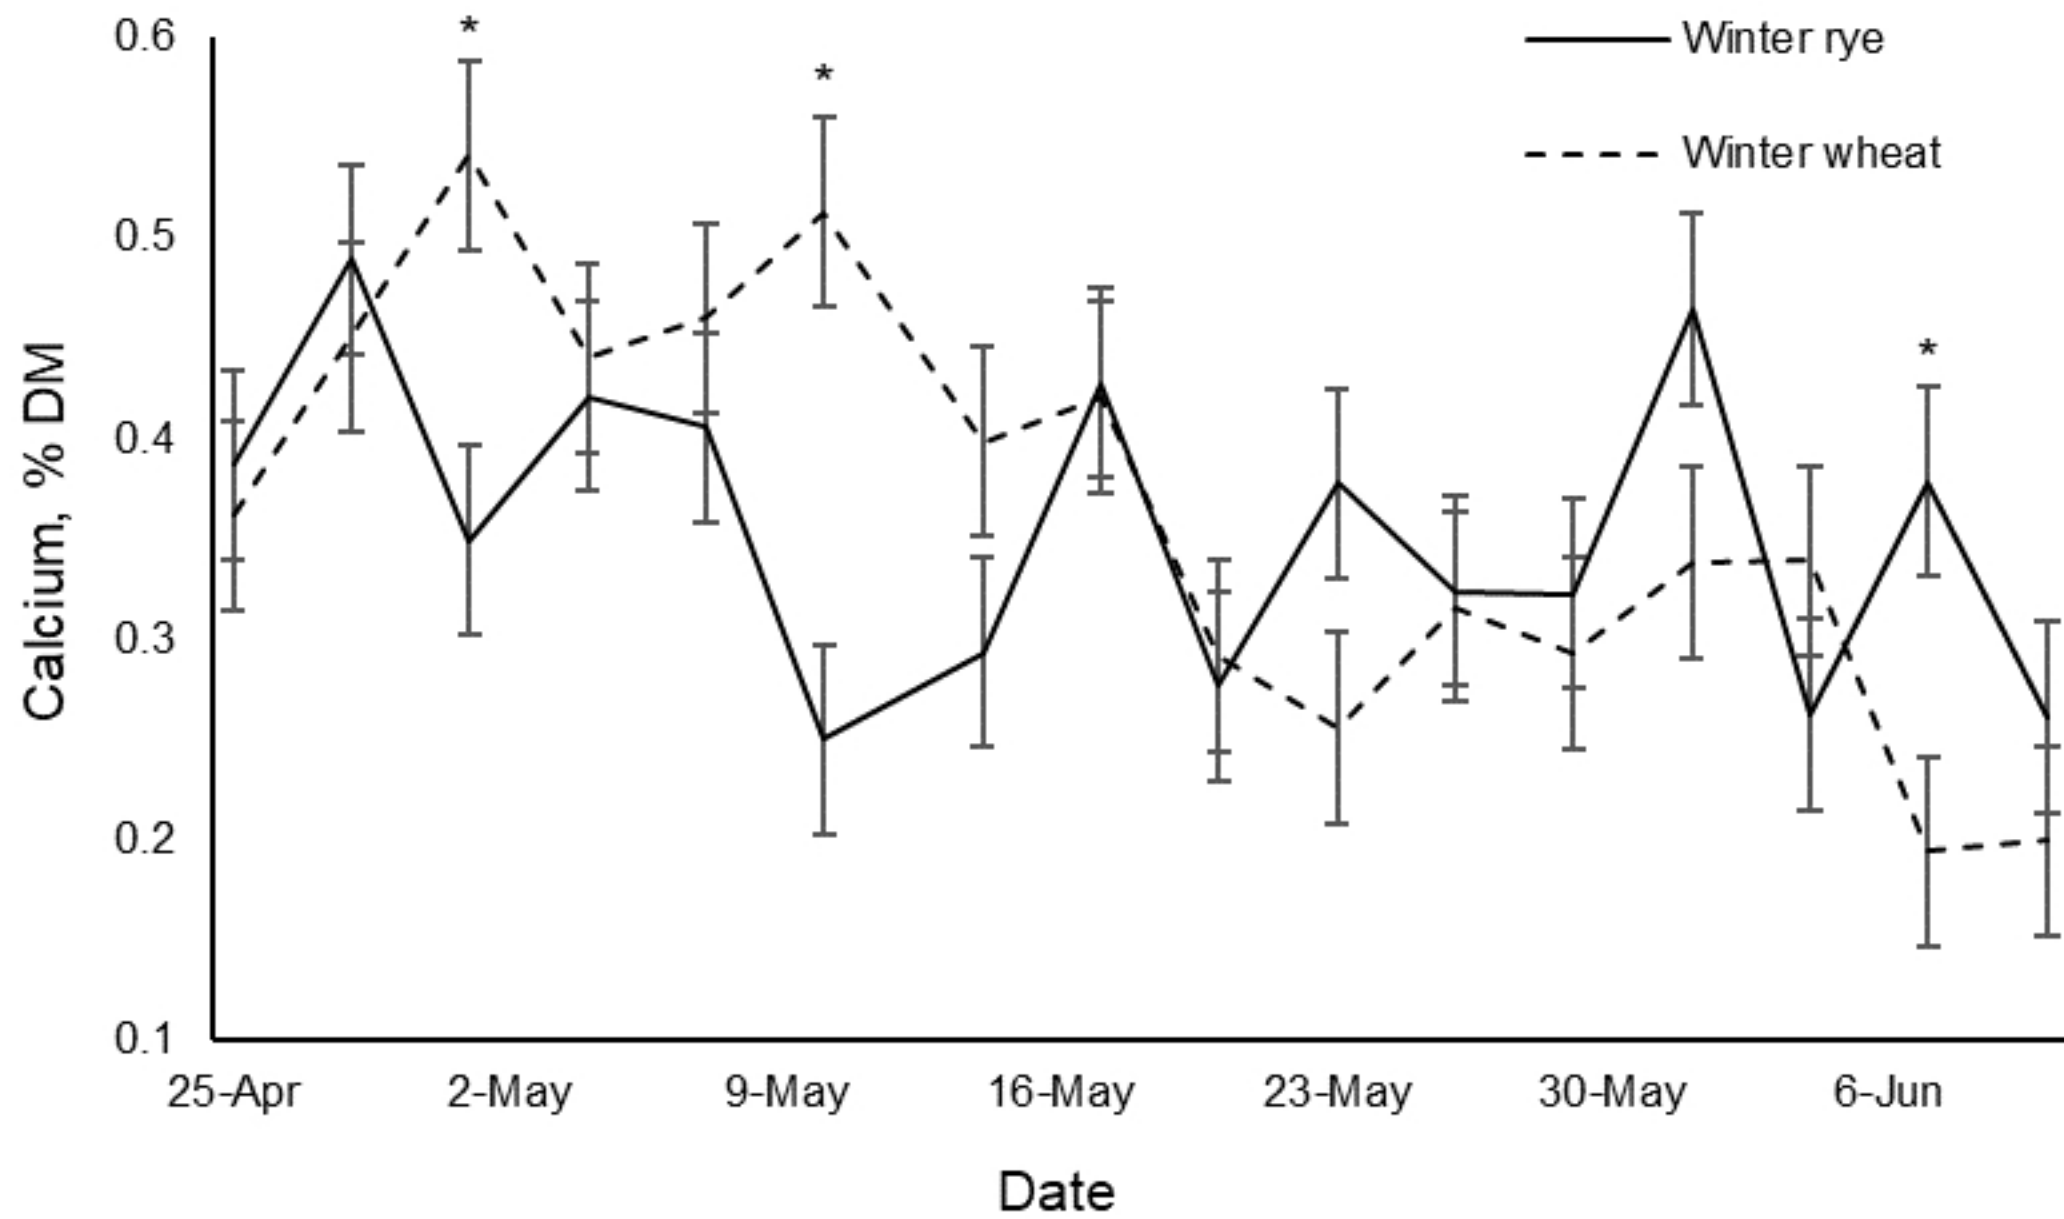

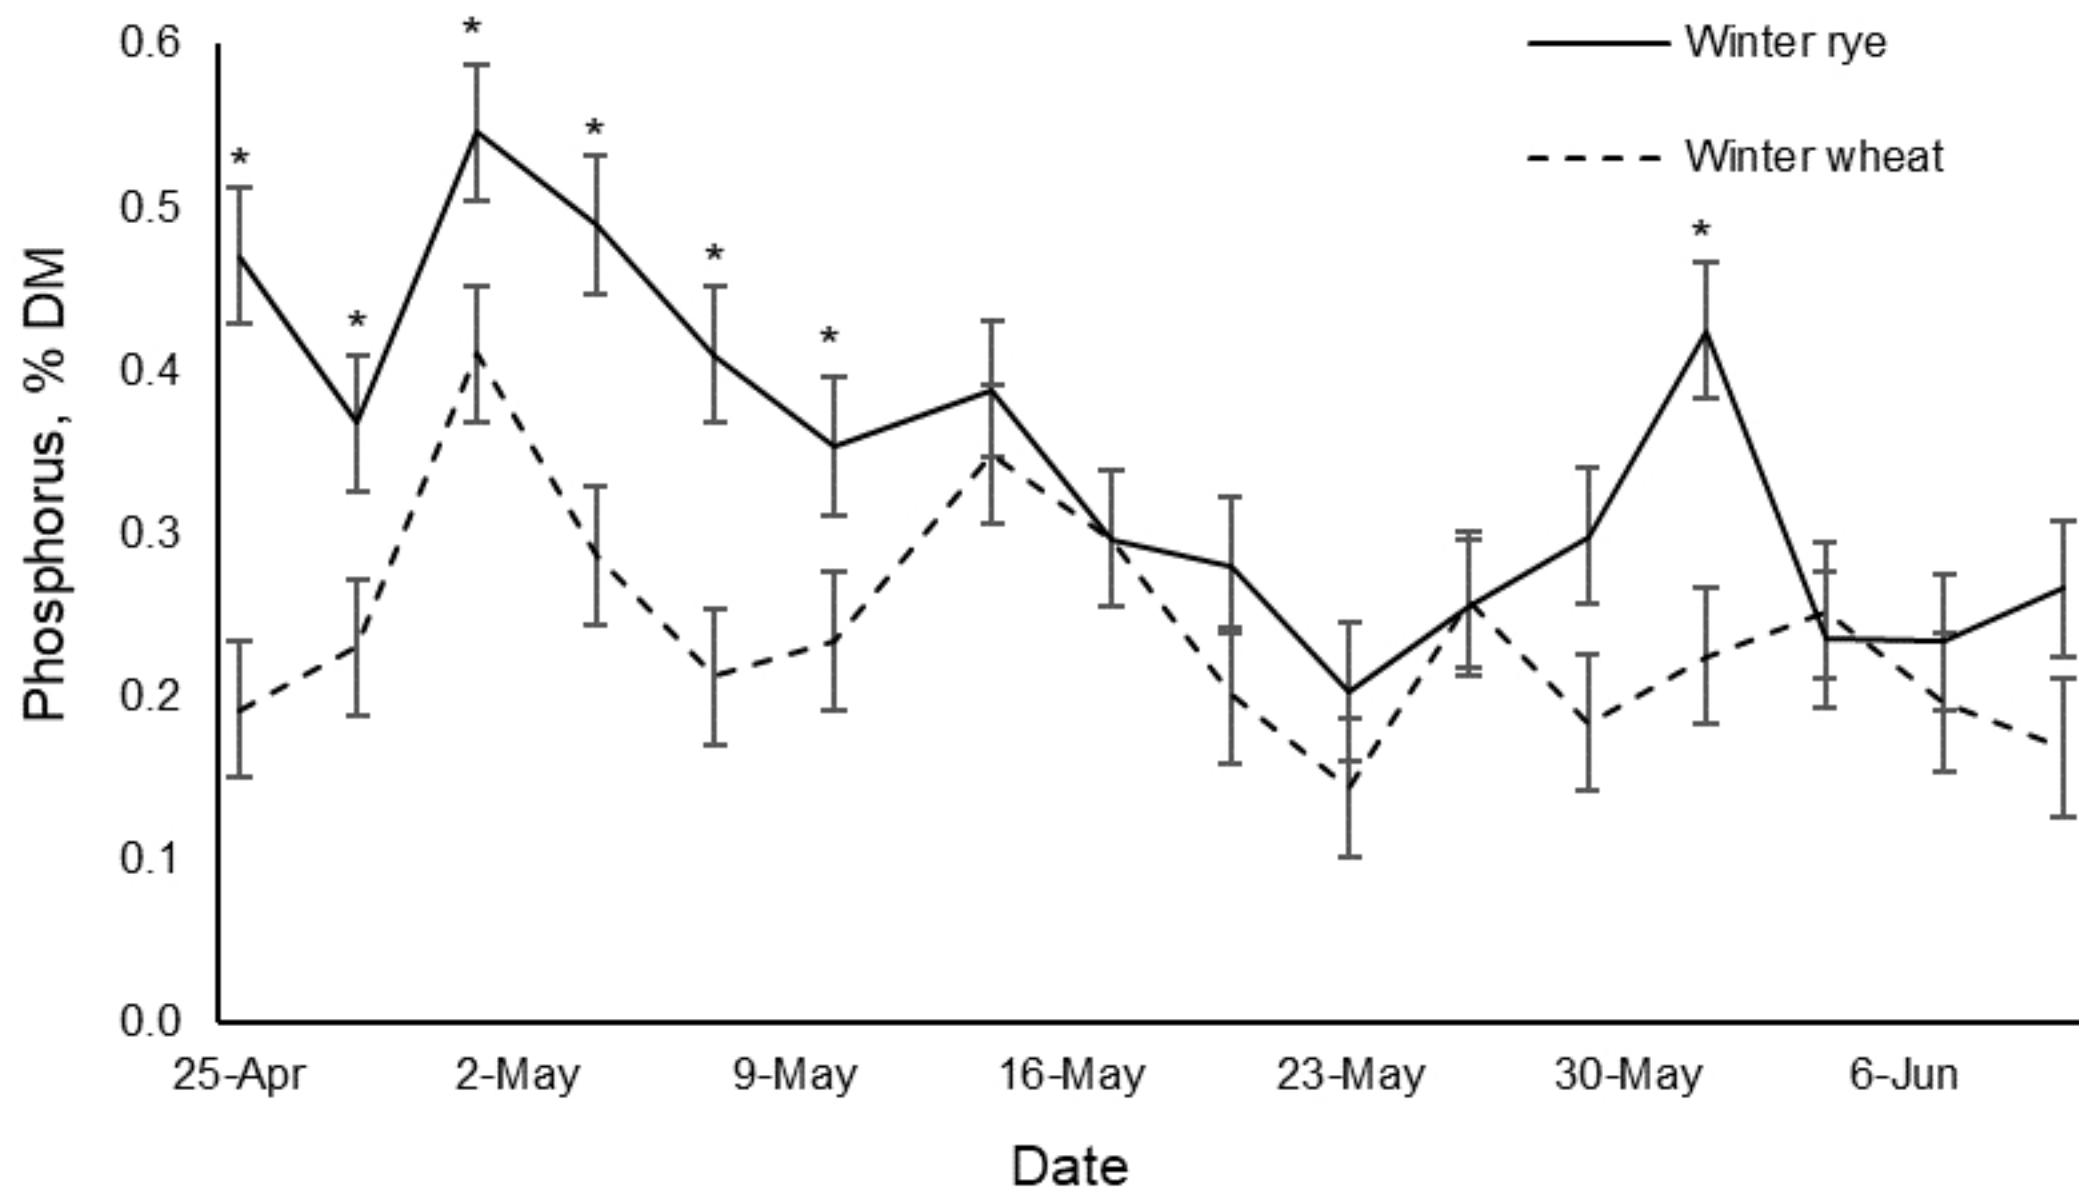

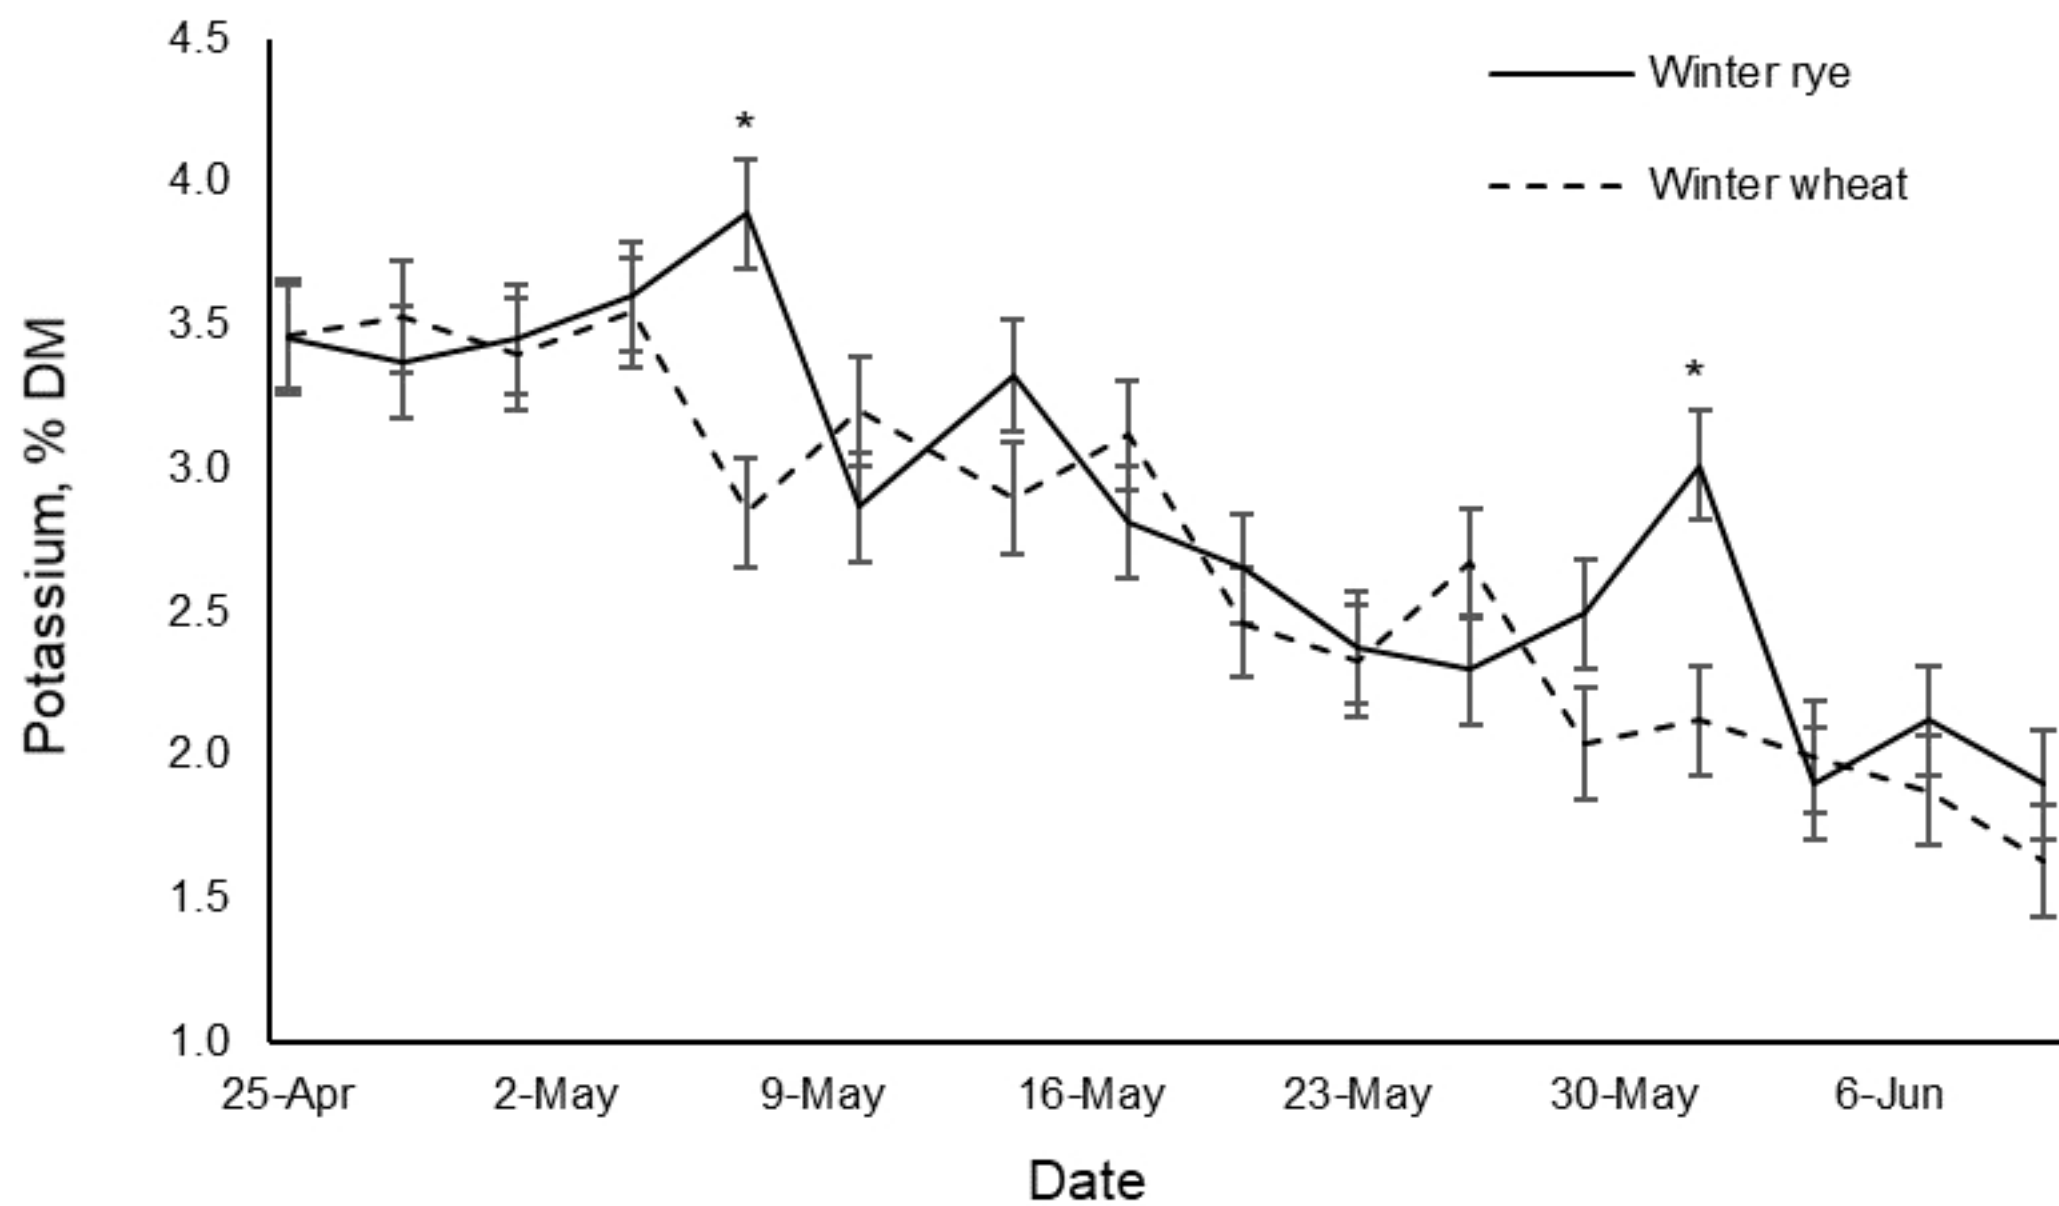

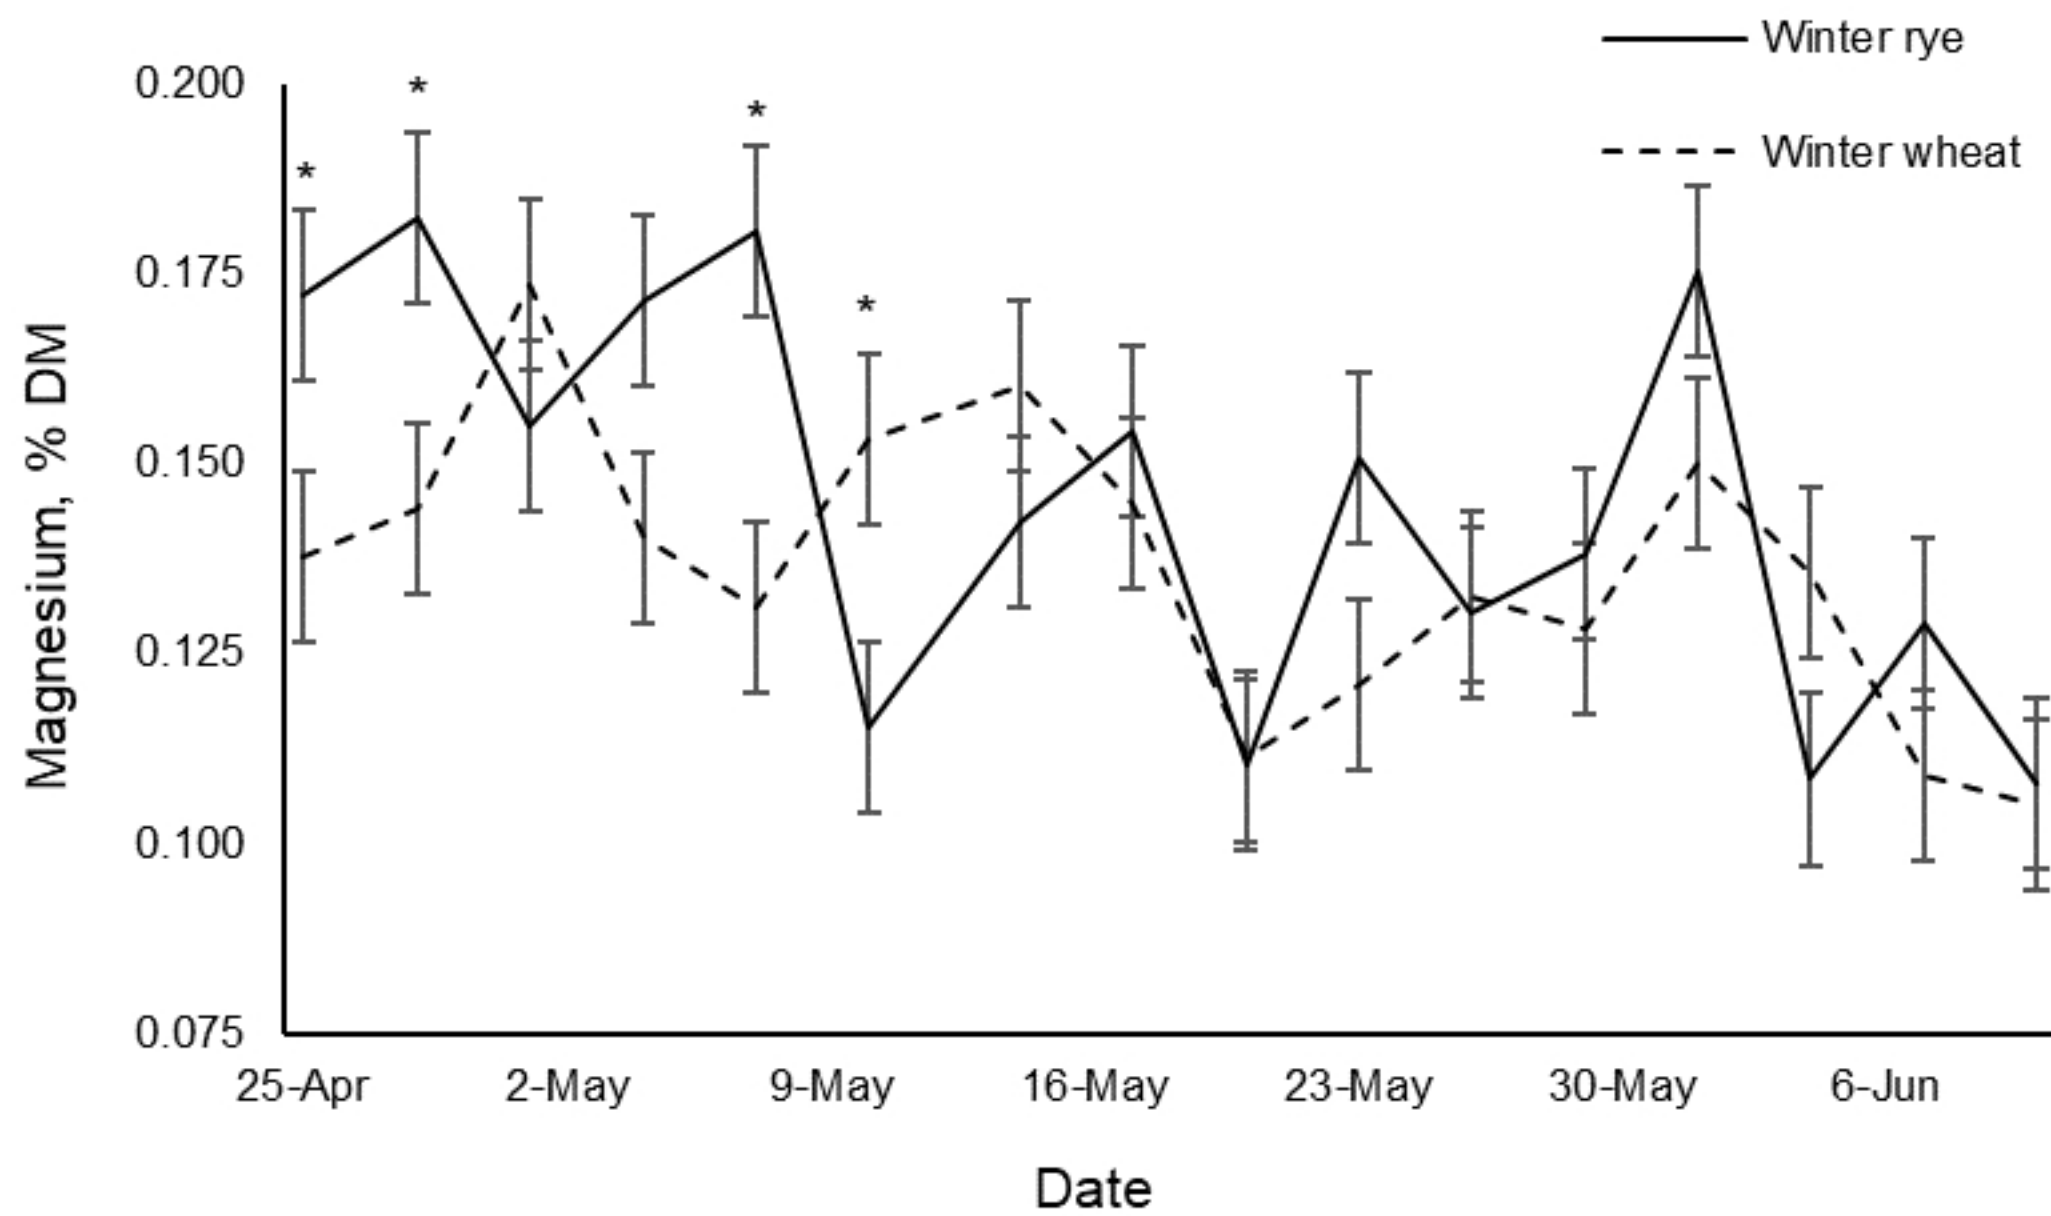

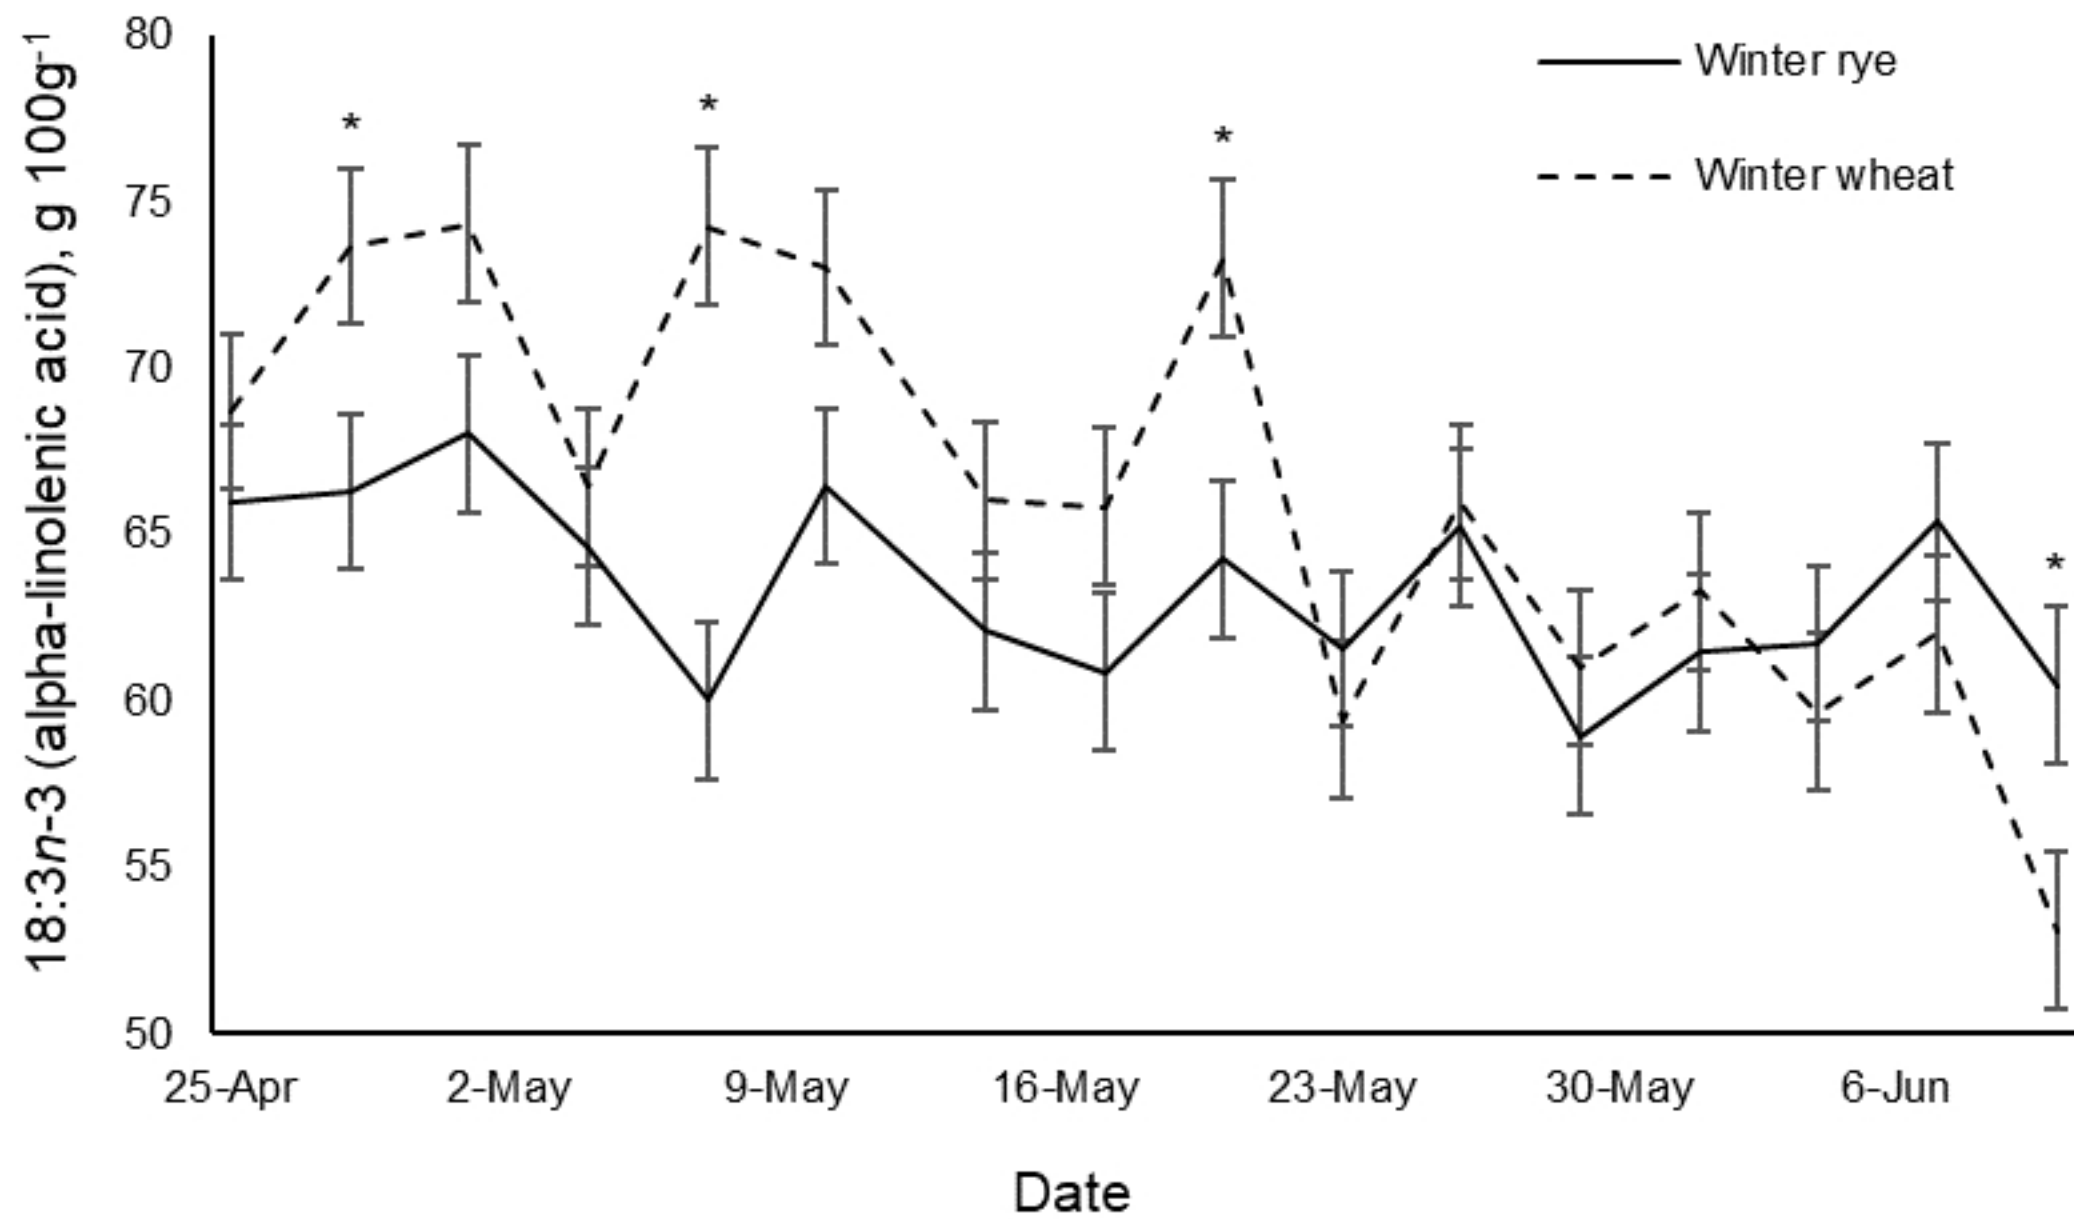

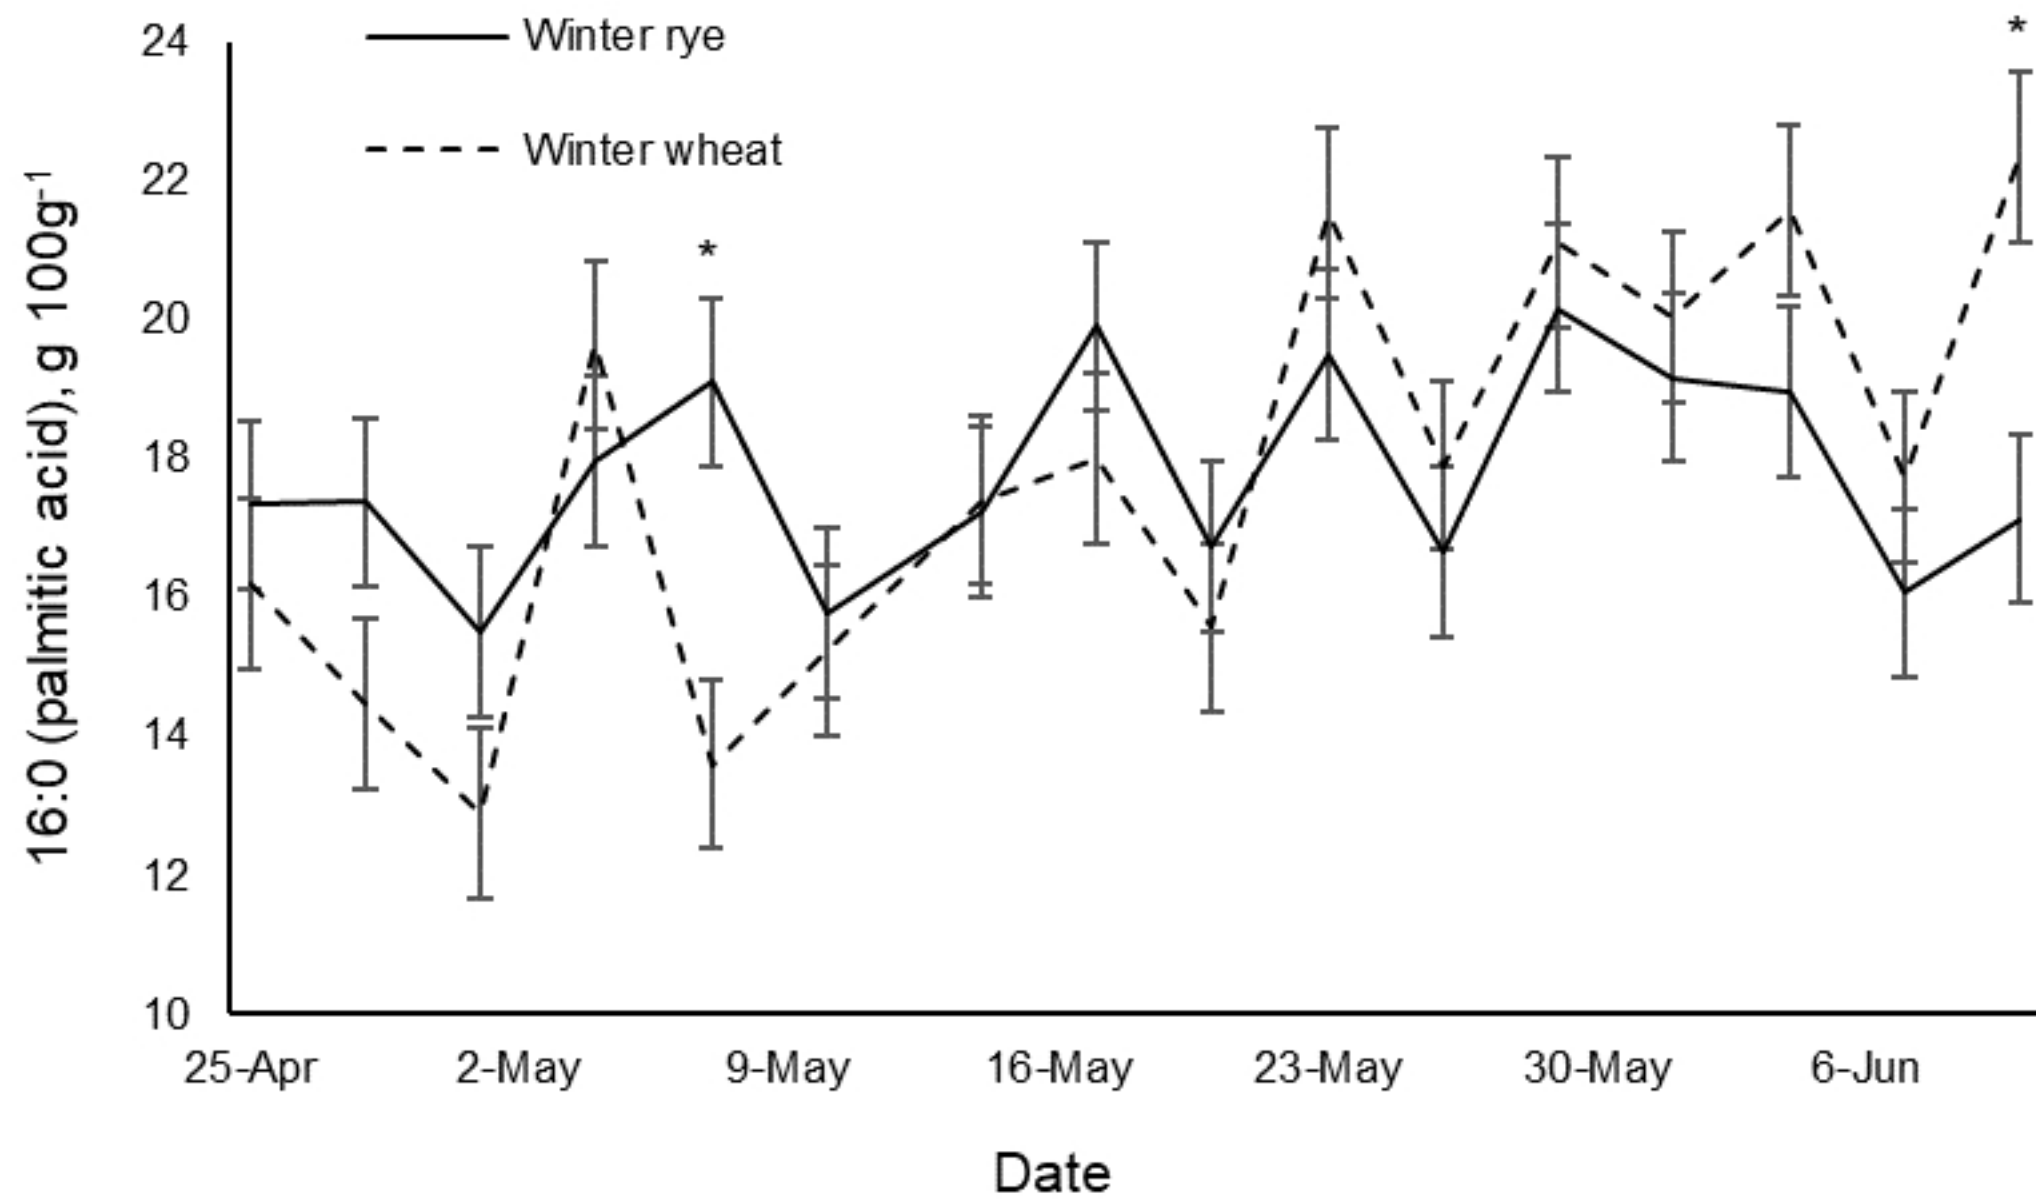

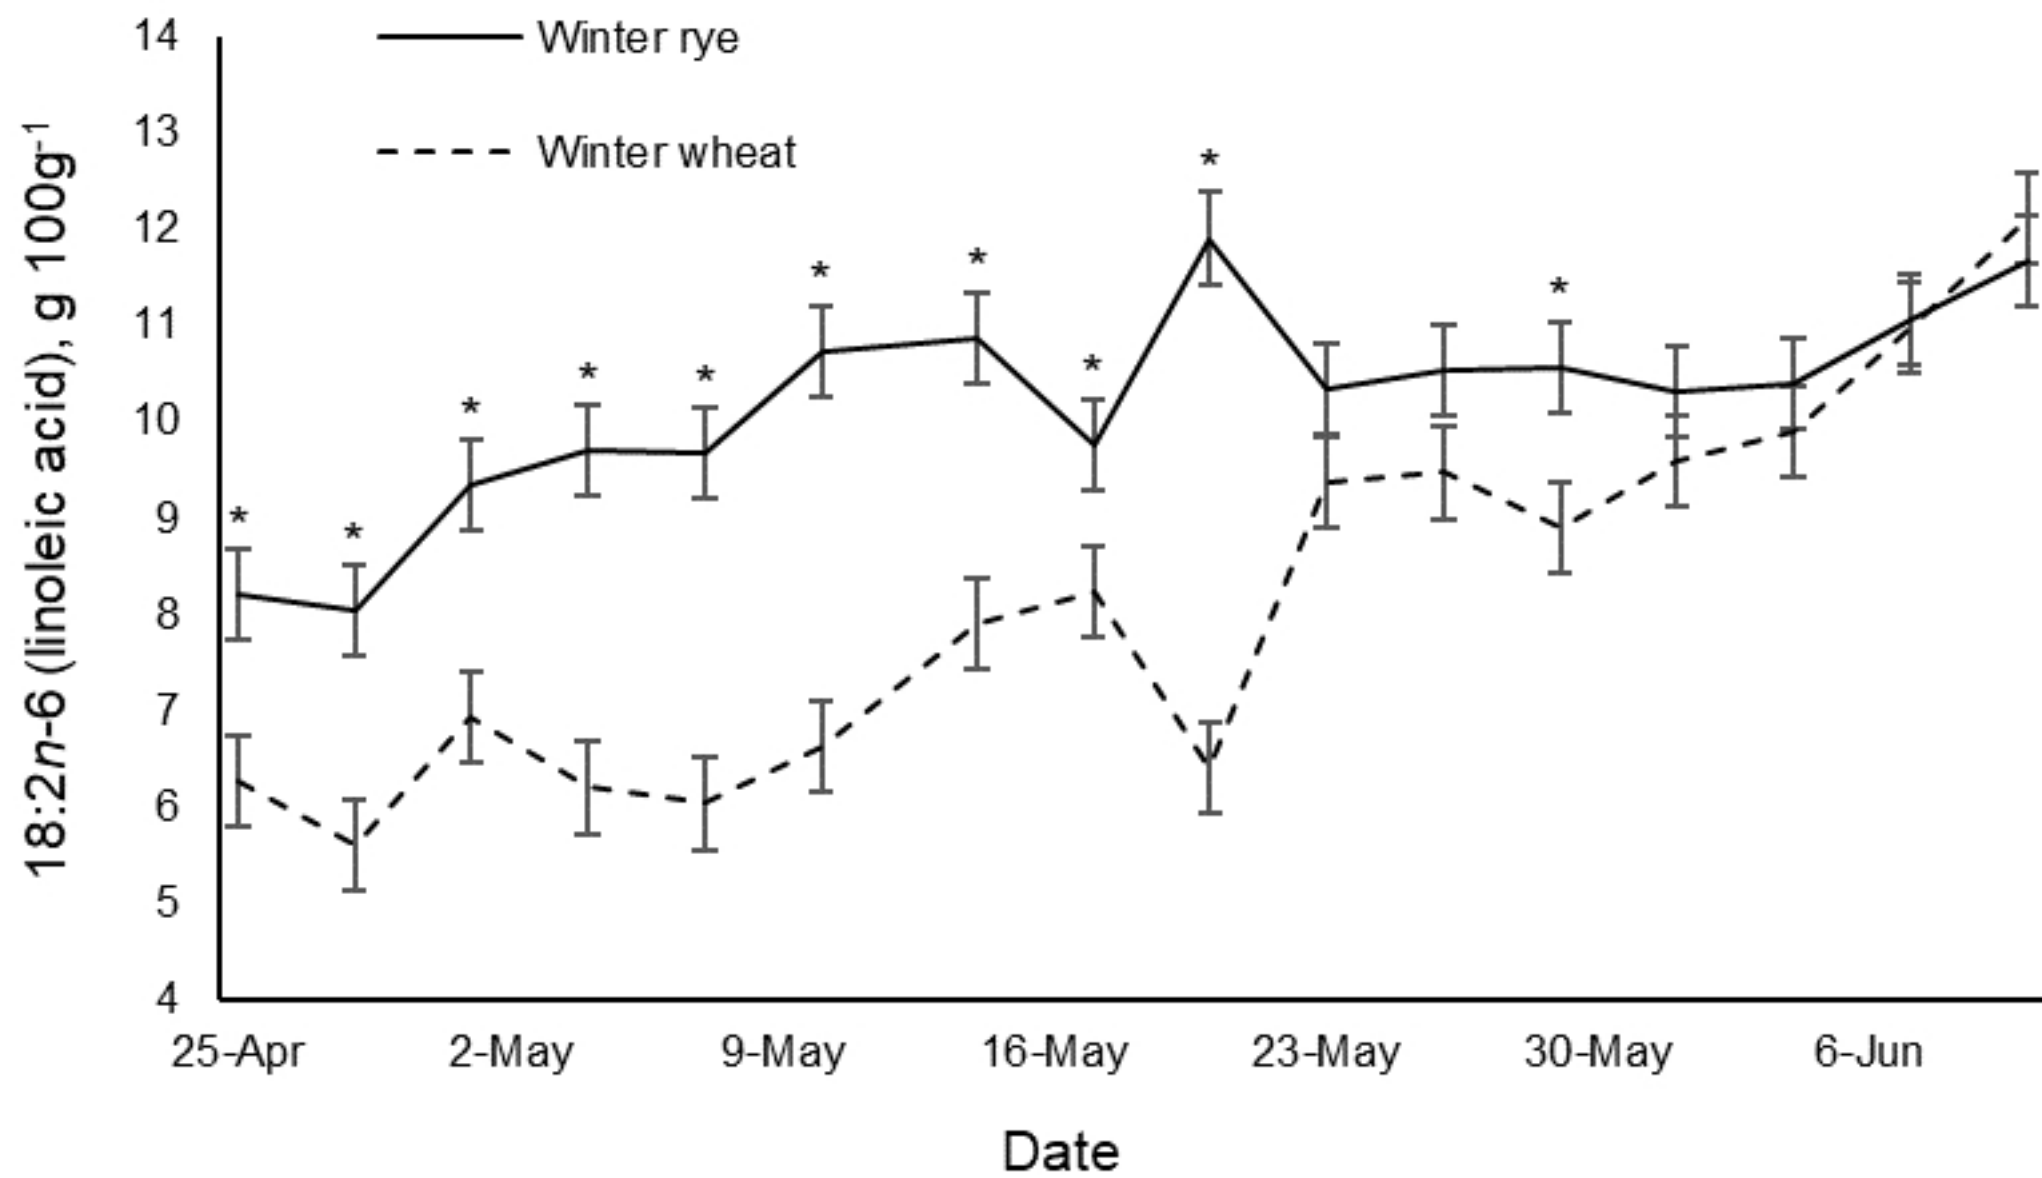

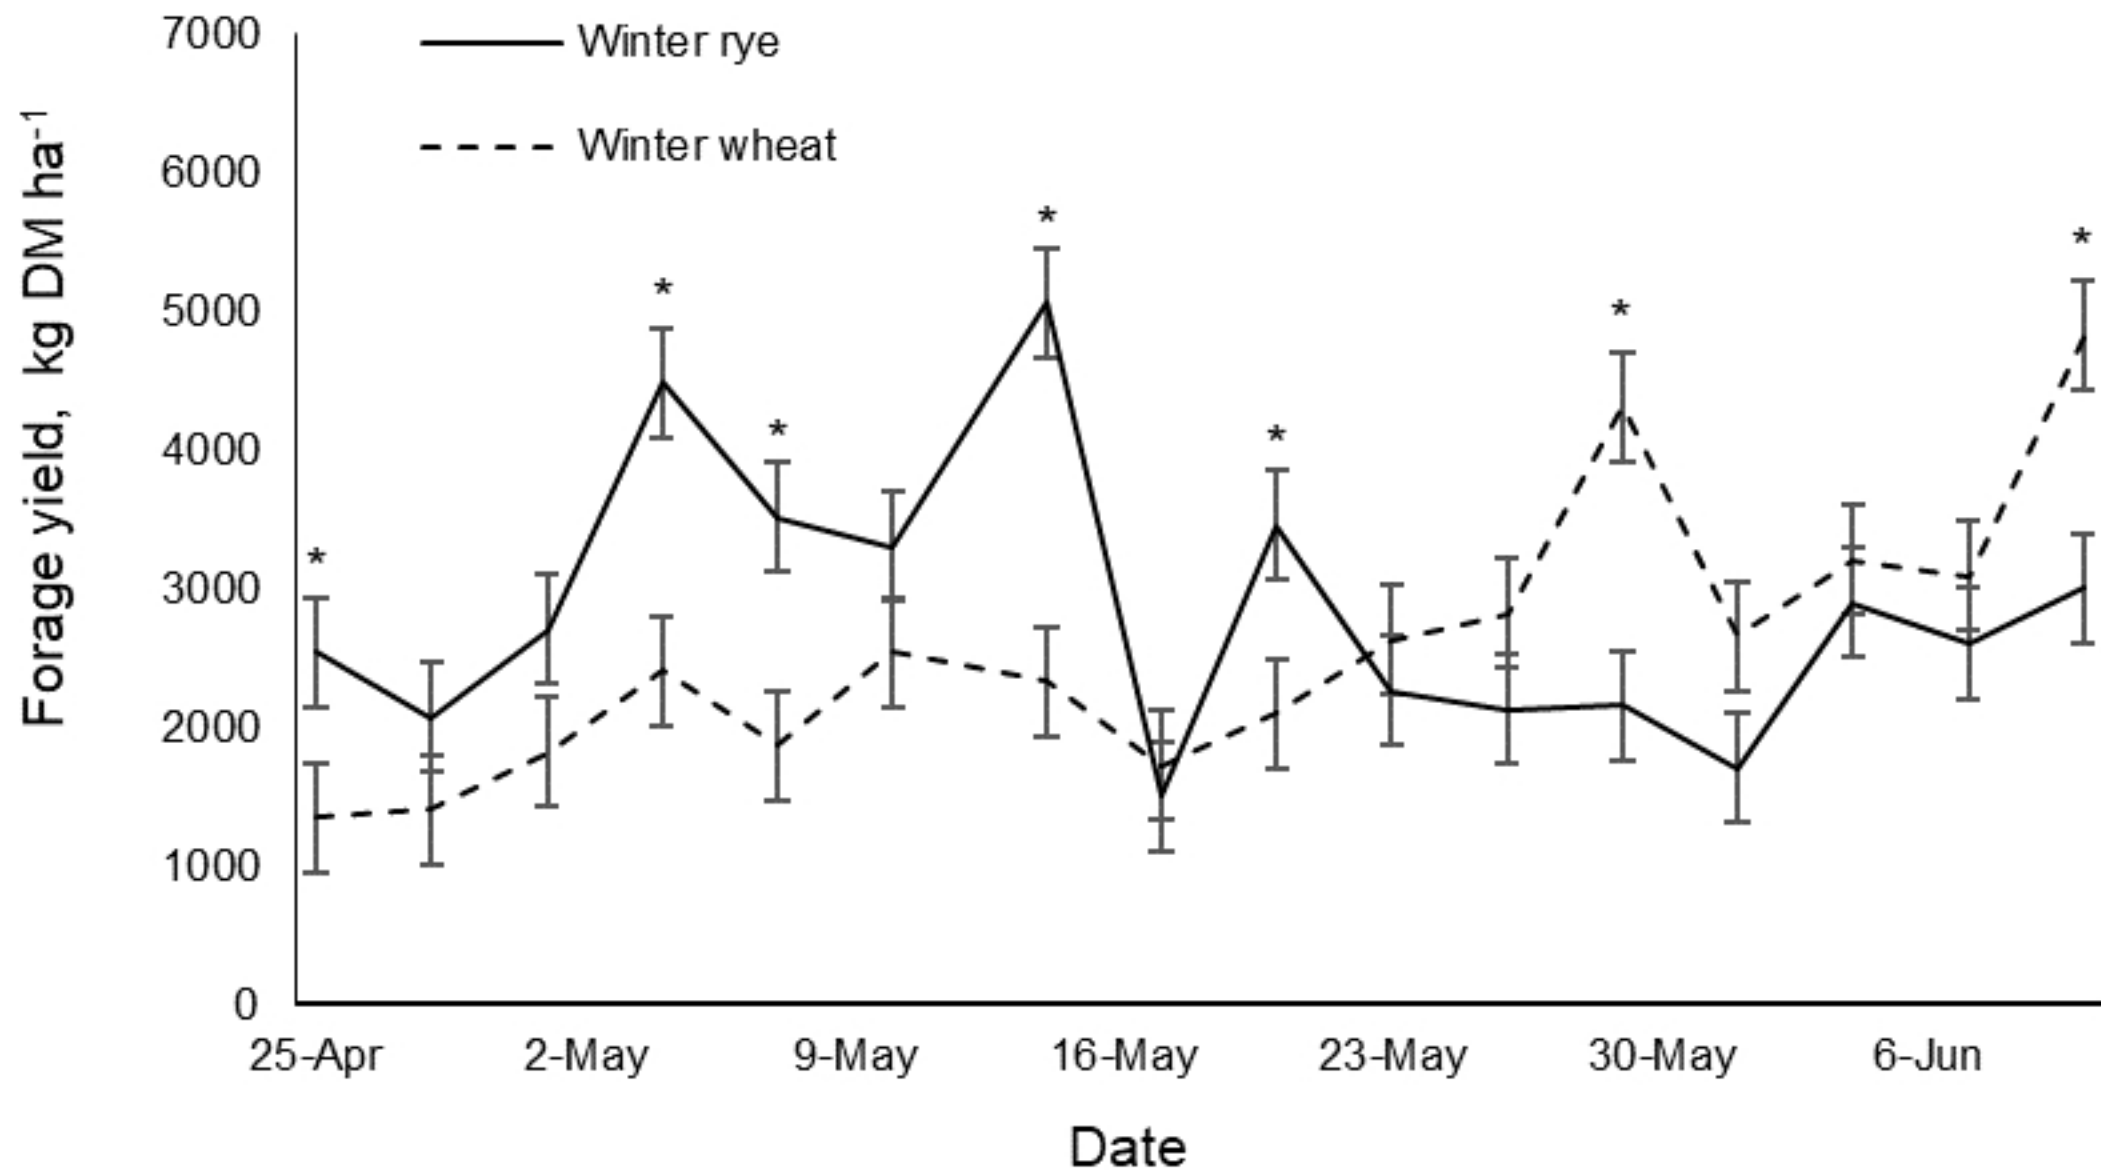

Source: https://www.biorxiv.org/content/10.1101/688952v1.full.pdf
